1  
2  
3  
4  
5  
6  
7  
8  
9  
10  
11  
12  
13  
14  
15  
16  
17  
18  
19  
20  
21

**Surface-bound antigen induces B-cell permeabilization and lysosome exocytosis  
facilitating antigen uptake and presentation to T-cells**

Fernando Y. Maeda<sup>1#</sup>, Jurriaan J. H. van Haaren<sup>1#</sup>, David B. Langley<sup>2</sup>, Daniel Christ<sup>2,3</sup>, Norma W. Andrews<sup>1\*</sup> and Wenxia Song<sup>1\*</sup>

<sup>1</sup>Department of Cell Biology and Molecular Genetics, University of Maryland, College Park, MD 20742, USA.

<sup>2</sup>Immunology Division, Garvan Institute of Medical Research, Darlinghurst, NSW 2010, Australia

<sup>3</sup>St Vincent's Clinical School, University of New South Wales, Darlinghurst, NSW 2010, Australia

<sup>#</sup>These authors contributed equally to this study.

\*Co-corresponding authors:

Wenxia Song: wensong@umd.edu

Norma Andrews: andrewsn@umd.edu

22 **Abstract**

23 B-cell receptor (BCR)-mediated antigen internalization and presentation are essential for  
24 humoral memory immune responses. Antigen encountered by B-cells is often tightly associated  
25 with the surface of pathogens and/or antigen-presenting cells. Internalization of such antigens  
26 requires myosin-mediated traction forces and extracellular release of lysosomal enzymes, but the  
27 mechanism triggering lysosomal exocytosis is unknown. Here we show that BCR-mediated  
28 recognition of antigen tethered to beads, to planar lipid-bilayers or expressed on cell surfaces  
29 causes localized plasma membrane (PM) permeabilization, a process that requires BCR signaling  
30 and non-muscle myosin II. B-cell permeabilization triggers PM repair responses involving  
31 lysosomal exocytosis, and B-cells permeabilized by surface-associated antigen internalize more  
32 antigen than cells that remain intact. Higher affinity antigens cause more B-cell permeabilization  
33 and lysosomal exocytosis and are more efficiently presented to T-cells. Thus, PM  
34 permeabilization by surface-associated antigen triggers a lysosome-mediated B-cell resealing  
35 response, providing the extracellular hydrolases that facilitate antigen internalization and  
36 presentation.

## 37 **Introduction**

38 B-cells are responsible for generating antibody responses that neutralize pathogens and attract  
39 other immune cells. B-cell activation is initiated by the B-cell receptor (BCR), which surveys  
40 antigen through its membrane-anchored immunoglobulin (Reth 1994). Antigen-BCR interaction  
41 induces signaling cascades and antigen internalization, followed by intracellular processing and  
42 surface presentation to T-cells. Antigen presentation is essential for the activation of B-cells and  
43 their differentiation into high-affinity memory or antibody-secreting cells (Shlomchik and Weisel  
44 2012). A property that is critical for maximizing humoral protection is the ability of clonal-  
45 specific BCRs to recognize antigens in their different physical, chemical, and biological forms.

46

47 Antigen encountered by B-cells *in vivo* is often tightly associated with the surface of pathogens,  
48 such as parasites, bacteria and viruses, and/or antigen-presenting cells, such as follicular  
49 dendritic cells (Gonzalez *et al.* 2011). Internalization, processing, and presentation of such  
50 surface-bound antigens are essential for specific B-cells to obtain T-cell help, which is critical  
51 for B-cell activation and differentiation. Follicular dendritic cells, which are uniquely present in  
52 germinal centers of secondary lymphoid organs, internalize antigens that drain into these organs  
53 and present them to B-cells (Suzuki *et al.* 2009; Cyster 2010). Competition between high and  
54 low-affinity B-cells to acquire antigen from follicular dendritic cells is a critical step in the  
55 selection of high-affinity B-cells that differentiate into memory B-cells and long-lived plasma  
56 cells.

57

58 B-cells, follicular B-cells in particular, are thought to have a limited ability to phagocytose large  
59 insoluble antigen particles (Vidard *et al.* 1996). However, B-cells are able to extract and

60 endocytose antigen that is tightly associated with non-internalizable surfaces (Batista and  
61 Neuberger 2000). Importantly, the efficiency by which B-cells present antigen depends more  
62 strongly on the BCR-antigen binding affinity when the antigen is associated with non-  
63 internalizable surfaces, compared to antigen bound to particles that can be internalized (Batista  
64 and Neuberger 2000). Recent studies using antigen-coated beads, planar lipid bilayers, or plasma  
65 membrane (PM) sheets revealed two major mechanisms by which B-cells extract antigen from  
66 non-internalizable surfaces for endocytosis. Mechanical forces, generated by non-muscle myosin  
67 II (NMII) activation at sites of antigen-BCR interaction, can directly pull antigen from presenting  
68 surfaces for endocytosis. When mechanical forces alone are not sufficient, hydrolases released  
69 from lysosomes cleave surface-associated antigen to facilitate internalization (Yuseff *et al.* 2011;  
70 Natkanski *et al.* 2013; Spillane and Tolar 2017; J. Wang *et al.* 2018). Surface-associated antigen  
71 was previously shown to induce polarization of B-cell lysosomes towards antigen-binding sites  
72 (Yuseff *et al.* 2011), but the mechanism responsible for triggering lysosome exocytosis and  
73 release of hydrolytic enzymes was unknown.

74  
75 When cells are permeabilized by physical tearing or by pore-forming proteins,  $\text{Ca}^{2+}$  influx  
76 triggers rapid exocytosis of lysosomes as part of the process that repairs the PM and prevents cell  
77 death (Reddy *et al.* 2001; Andrews *et al.* 2014). Since its discovery several decades ago  
78 (Rodríguez *et al.* 1997),  $\text{Ca}^{2+}$ -dependent exocytosis of lysosomes has been observed in many cell  
79 types (Zhang *et al.* 2007; Naegeli *et al.* 2017; Villeneuve *et al.* 2018; Ibata *et al.* 2019). We  
80 previously reported that permeabilizing the PM of mouse splenic B-cells with the pore-forming  
81 toxin streptolysin O (SLO) triggers lysosomal exocytosis, releasing hydrolases extracellularly  
82 and exposing the luminal epitope of the lysosome-associated protein LIMP-2 on the cell surface.

83 B-cells rapidly reseal these PM lesions, in a process that requires lysosomal exocytosis (Miller *et*  
84 *al.* 2015). Surprisingly, here we found that interaction of the BCR with surface-associated  
85 antigen can permeabilize the B-cell PM, triggering a resealing mechanism that involves  
86 exocytosis of lysosomes. We investigated this process by determining if antigen-induced PM  
87 permeabilization depends on BCR-antigen binding affinity, BCR signaling and NMII motor  
88 activity, and if it influences the ability of B-cells to internalize and present surface-associated  
89 antigens to T-cells.

90

## 91 **Results**

### 92 **BCR interaction with surface-associated antigen induces B-cell PM permeabilization at** 93 **antigen-binding sites**

94 We initially utilized two experimental models previously used to study BCR-mediated  
95 internalization of surface-associated antigen: F(ab')<sub>2</sub>-anti-mouse IgM+G ( $\alpha$ M, which binds and  
96 activates mouse BCRs) immobilized on beads or tethered to planar lipid bilayers (PLB) by  
97 biotin-streptavidin interaction. Beads or PLB coated with transferrin (Tf) at similar surface  
98 density were used as controls, as Tf does not activate the BCR and interacts with the Tf receptor  
99 with similar affinity as binding of the *bona fide* antigen hen egg lysozyme (HEL) to the BCR of  
100 transgenic MD4 mouse B-cells (Batista and Neuberger 1998; Fuchs and Gessner 2002).  
101 Strikingly, live-cell imaging revealed entry of the membrane-impermeable dye propidium iodide  
102 (PI) at B-cell locations in contact with  $\alpha$ M-beads, indicating that PM permeabilization occurred  
103 at bead-binding sites (*Figure 1A*, *Figure 1-figure supplement 1*, and *Videos 1-3*). While similar  
104 percentages of B-cells bound  $\alpha$ M- or Tf-beads (*Figure 1B*), a significantly higher fraction of B-  
105 cells binding  $\alpha$ M-beads became PI-positive (*Figure 1C*). Flow cytometry analysis confirmed the

**Figure 1**

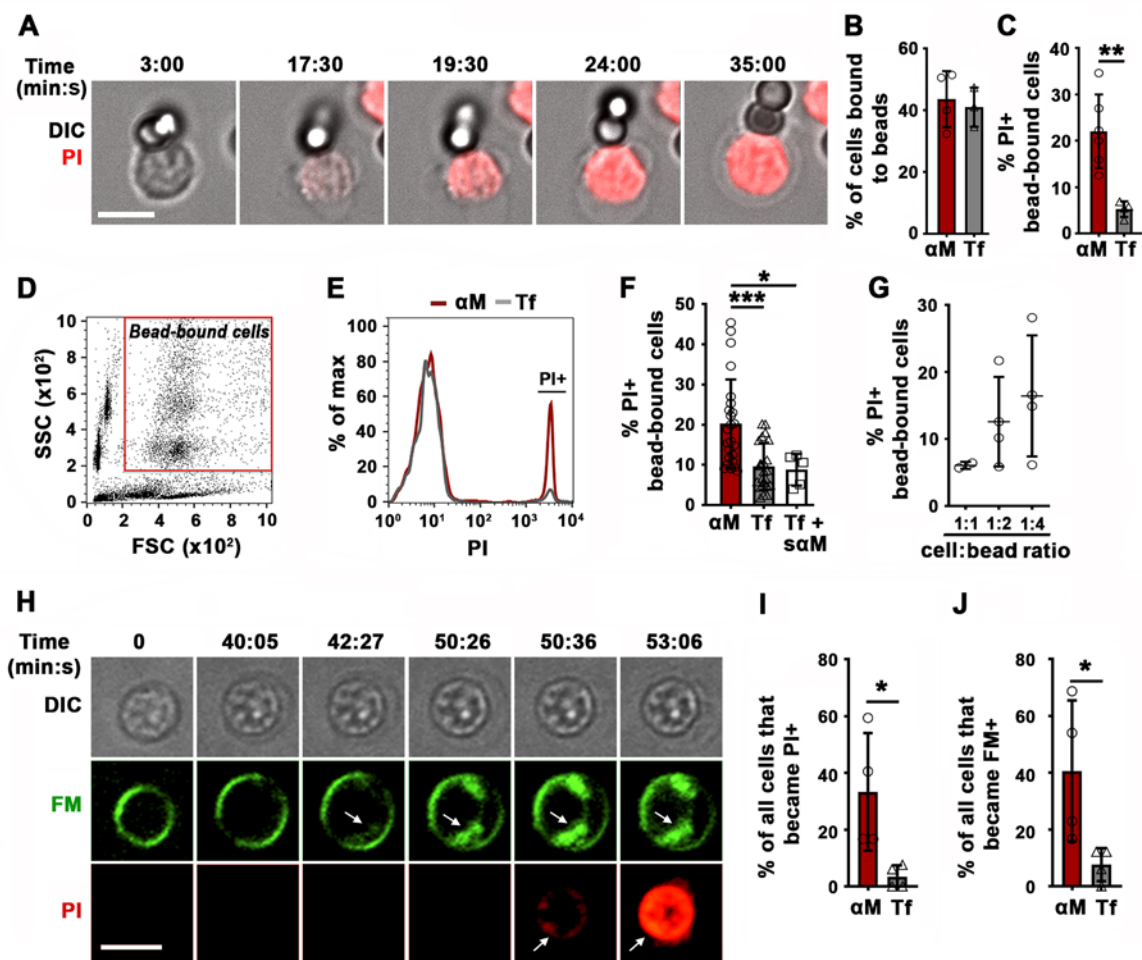

107 **Figure 1. BCR binding to surface-associated ligands causes B-cell PM permeabilization. (A)**

108 Spinning disk time-lapse images of a splenic B-cell incubated with  $\alpha$ M-beads (1:2 cell:bead  
109 ratio) in the presence of PI (*Video 1*). **(B)** Percentages of B-cells bound to beads. Data points  
110 represent independent experiments (mean  $\pm$  SD). **(C)** Percentages of PI-positive (PI+) cells in  
111 bead-bound B-cells at 30 min quantified from the images. Data points represent independent  
112 experiments (mean  $\pm$  SD). **(D)** Gate for bead-bound B-cells in a flow cytometry forward and side  
113 scatter dot plot. **(E)** Histograms of PI fluorescence intensity (FI) of  $\alpha$ M- and Tf-bead-bound B-  
114 cells after 30 min incubation. **(F)** Percentages of PI+ bead-bound B-cells after 30 min incubation  
115 with  $\alpha$ M- or Tf-beads in the presence or absence of soluble  $\alpha$ M ( $s\alpha$ M). Data points represent  
116 independent experiments (mean  $\pm$  SD). **(G)** Percentages of PI+ bead-bound B-cells after 30 min  
117 with  $\alpha$ M-beads at indicated cell:bead ratios. Data points represent independent experiments  
118 (mean  $\pm$  SD). **(H)** Spinning disk time-lapse images of a B-cell interacting with  $\alpha$ M-PLB in the  
119 presence of FM1-43 and PI (arrows, FM1-43 or PI entry, *Video 4*). **(I)** Percentages of PI+ B-cells  
120 interacting with  $\alpha$ M- or Tf-PLB for 30 min. Data points represent independent experiments  
121 (mean  $\pm$  SD). **(J)** Percentages of B-cells interacting with  $\alpha$ M- or Tf-PLB for 30 min and  
122 exhibiting intracellular FM staining (FM+). Data points represent independent experiments  
123 (mean  $\pm$  SD). Bars, 5  $\mu$ m. \* $p \leq 0.05$ , \*\* $p \leq 0.01$ , \*\*\* $p \leq 0.005$ , unpaired Student's *t*-test or one-way  
124 ANOVA.

125 **Figure supplement 1.** BCR binding to  $\alpha$ M-beads causes localized PM permeabilization in B-  
126 cells.

127 **Figure supplement 2.** Identification of bead-bound B-cells by flow cytometry.

128 **Figure supplement 3.** BCR binding to  $\alpha$ M-beads does not increase apoptosis in B-cells.

129 **Figure supplement 4.** Sudden increases in intracellular FM staining in B-cells permeabilized  
130 during interaction with  $\alpha$ M-PLB.

131 **Figure supplement 5.** The lipophilic FM dye enters B-cells permeabilized by  $\alpha$ M-PLB, staining  
132 the nuclear envelope.

133

134 increased PI entry in B-cells binding  $\alpha$ M-beads when compared to Tf-beads (*Figure 1D-G and*  
135 *Figure 1-figure supplement 2*). Addition of soluble F(ab')<sub>2</sub>-anti-mouse IgM+G ( $\alpha$ M, also  
136 capable of binding and activating the BCR) did not increase the frequency of PI entry in B-cells  
137 binding to Tf-beads (*Figure 1F*). The percentage of cells positive for cleaved caspase-3, an early  
138 apoptotic marker, was similar in B-cells interacting or not with  $\alpha$ M- or Tf-beads and only increased  
139 significantly after treatment with staurosporine (*Figure 1-figure supplement 3*), suggesting that PM  
140 permeabilization is not associated with apoptosis. Similar observations were made using the PLB  
141 system that allows lateral movement of the tethered antigen (Dustin *et al.* 2007). Significantly  
142 more B-cells became PI-positive when contacting  $\alpha$ M-PLB when compared to Tf-PLB (*Figure*  
143 *1H and I*).

144  
145 PM permeabilization in B-cells binding to  $\alpha$ M-PLB was also observed using membrane-  
146 impermeable lipophilic FM probes. These fluorescent dyes have been used extensively to assess  
147 PM integrity, because they only label the outer PM leaflet of intact cells but rapidly stain  
148 intracellular membranes when entering the cytosol (Bansal *et al.* 2003; McNeil *et al.* 2003;  
149 Demonbreun *et al.* 2019). After >30 min of interaction with  $\alpha$ M-PLB, we observed sudden,  
150 massive increases in FM staining of intracellular membranes, including the nuclear envelope  
151 (*Figure 1H, arrows, Figure 1-figure supplements 4 and 5, and Video 4*). Consistent with the PI  
152 entry results (*Figure 1H and I*), significantly more B-cells showed a sudden increase in  
153 intracellular FM staining when contacting  $\alpha$ M-PLB when compared to Tf-PLB (*Figure 1H and*  
154 *J*). Sudden FM influx was only observed in B-cells that eventually became PI-positive, not in  
155 cells that remained PI-negative during interaction with  $\alpha$ M-PLB. These observations, in addition  
156 to the minimal amounts of intracellular FM detected in all B-cells prior to 30-40 min, indicate



157 that the massive intracellular staining of B-cells binding  $\alpha$ M-PLB reflects sudden PM  
158 permeabilization and not gradual endocytosis of the dye.  
159  
160 As an independent method to demonstrate antigen-induced PM permeabilization in B-cells, we  
161 took advantage of the ability of membrane-impermeable Ponceau 4R to quench cytosolic  
162 fluorophores upon entering cells (Tay *et al.* 2019). Instead of monitoring nuclear or intracellular  
163 membrane staining by membrane-impermeable fluorescent dyes, we determined the percentage  
164 of B-cells pre-loaded with carboxyfluorescein succinimidyl ester (CFSE) that lost their cytosolic  
165 fluorescence as a consequence of Ponceau 4R entry during PM permeabilization. To validate this  
166 method, we first permeabilized B-cells with the pore-forming toxin streptolysin O (SLO). In the  
167 presence of Ponceau 4R, the percentage of B-cells with reduced fluorescence levels of CFSE  
168 increased significantly after exposure to SLO (*Figure 2A and B*), mimicking what we previously  
169 observed for PI entry in SLO-treated B-cells (Miller *et al.* 2015). Thus, quenching of  
170 cytoplasmic CFSE by the membrane-impermeable Ponceau 4R is a potent indicator of PM  
171 permeabilization. Using this method, we compared B-cells incubated with  $\alpha$ M- or Tf-PLB using  
172 live-cell imaging. We found that a significantly higher percentage of CFSE-labeled B-cells  
173 showed fluorescence quenching when interacting with  $\alpha$ M-PLB, when compared to Tf-PLB  
174 (*Figure 2C and D, and Video 5*). The average time for detection of  $\alpha$ M-PLB-induced B-cell  
175 permeabilization measured by this quenching method was similar to what was observed for FM  
176 entry, while the average time for PI detection showed a ~8 min delay (*Figure 2E, Figure 1-figure*  
177 *supplements 4, and Video 4*). Thus, FM influx and Ponceau 4R-mediated quenching are more  
178 sensitive methods for detecting the onset of B-cell PM permeabilization when compared to PI  
179 influx, which is only clearly visualized after intercalation into double-stranded DNA inside the

**Figure 2**

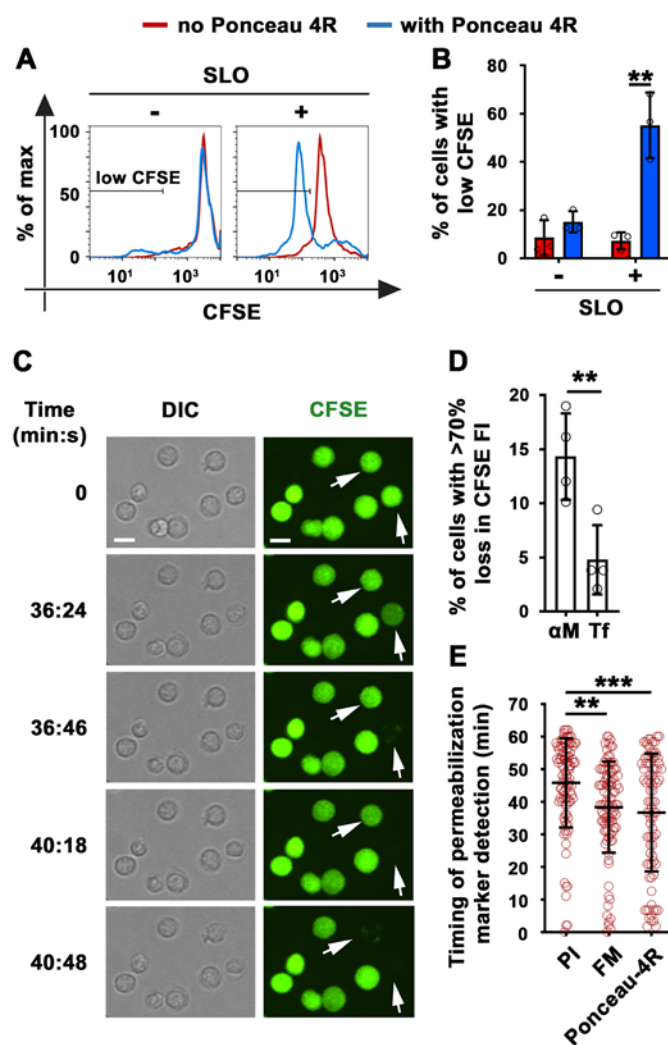

181 **Figure 2. Extracellular Ponceau 4R quenches cytoplasmic CFSE in  $\alpha$ M-PLB-permeabilized**  
182 **B-cells. (A)** Histograms of CFSE FI in B-cells treated with or without SLO for 10 min in the  
183 presence or absence of Ponceau 4R by flow cytometry. **(B)** Percentages of cells with reduced  
184 CFSE in the presence or absence of Ponceau 4R, after treatment with or without SLO. Data  
185 points represent independent experiments (mean  $\pm$  SD). **(C)** Spinning disk time-lapse images of  
186 B-cells pre-stained with CFSE interacting with  $\alpha$ M-PLB in the presence of Ponceau 4R (arrows,  
187 cells showing Ponceau 4R quenching of cytoplasmic CFSE) (*Video 5*). **(D)** Percentages of B-  
188 cells with more than 70% loss of CFSE FI after 60 min of interaction with  $\alpha$ M- or Tf -PLB. Data  
189 points represent independent experiments (mean  $\pm$  SD). **(E)** Timing of PI or FM1-43 entry or  
190 Ponceau 4R-mediated CFSE quenching in B-cells interacting with  $\alpha$ M-PLB. Data points  
191 represent individual cells in at least four independent experiments (mean  $\pm$  SD). Bars, 5  $\mu$ m.  
192 \*\* $p \leq 0.01$ , \*\*\* $p \leq 0.005$ , unpaired Student's *t*-test or one-way ANOVA.  
193

194 nucleus. Thus, based on consistent results obtained with three different methods, we conclude  
195 that BCR binding to  $\alpha$ M-coated surfaces (but not to soluble  $\alpha$ M) causes localized  
196 permeabilization of the B-cell PM.

197

198 We next determined whether HEL, a *bona fide* antigen recognized by the BCR of B-cells from  
199 MD4 mice, also caused B-cell permeabilization when tethered to artificial surfaces or presented  
200 as an integral membrane protein (mHEL) (Batista *et al.* 2001) on the surface of live cells. Flow  
201 cytometry analysis revealed that similar fractions of MD4 B-cells become PI-positive after  
202 binding beads coupled to  $\alpha$ M or to HEL (*Figure 3A-C*). In contrast, WT B-cells binding to HEL-  
203 beads showed a low percentage of PI-positive cells, similar to what was observed with Tf-beads  
204 (*Figure 1F and Figure 3A-C*). Importantly, MD4 B-cells interacting with live COS-7 cells  
205 expressing surface-associated mHEL-GFP showed marked co-clustering of the BCR and mHEL-  
206 GFP at cell-cell interaction sites, followed by PI influx. This pattern was not observed in WT B-  
207 cells whose BCR is incapable of specifically recognizing HEL (*Figure 3D and Videos 6 and 7*).  
208 A significantly higher percentage of MD4 B-cells showed PI influx after interaction with mHEL-  
209 GFP-expressing COS-7 cells, when compared to WT B-cells (*Figure 3E*). The percentage of PI-  
210 positive MD4 B-cells was also significantly higher after incubation with mHEL-expressing  
211 COS-7 cells than with mock-transfected cells (*Figure 3F*). Collectively, these results show that  
212 BCR binding to surface-associated antigen can cause localized permeabilization of the B-cell  
213 PM.

214

**Figure 3**

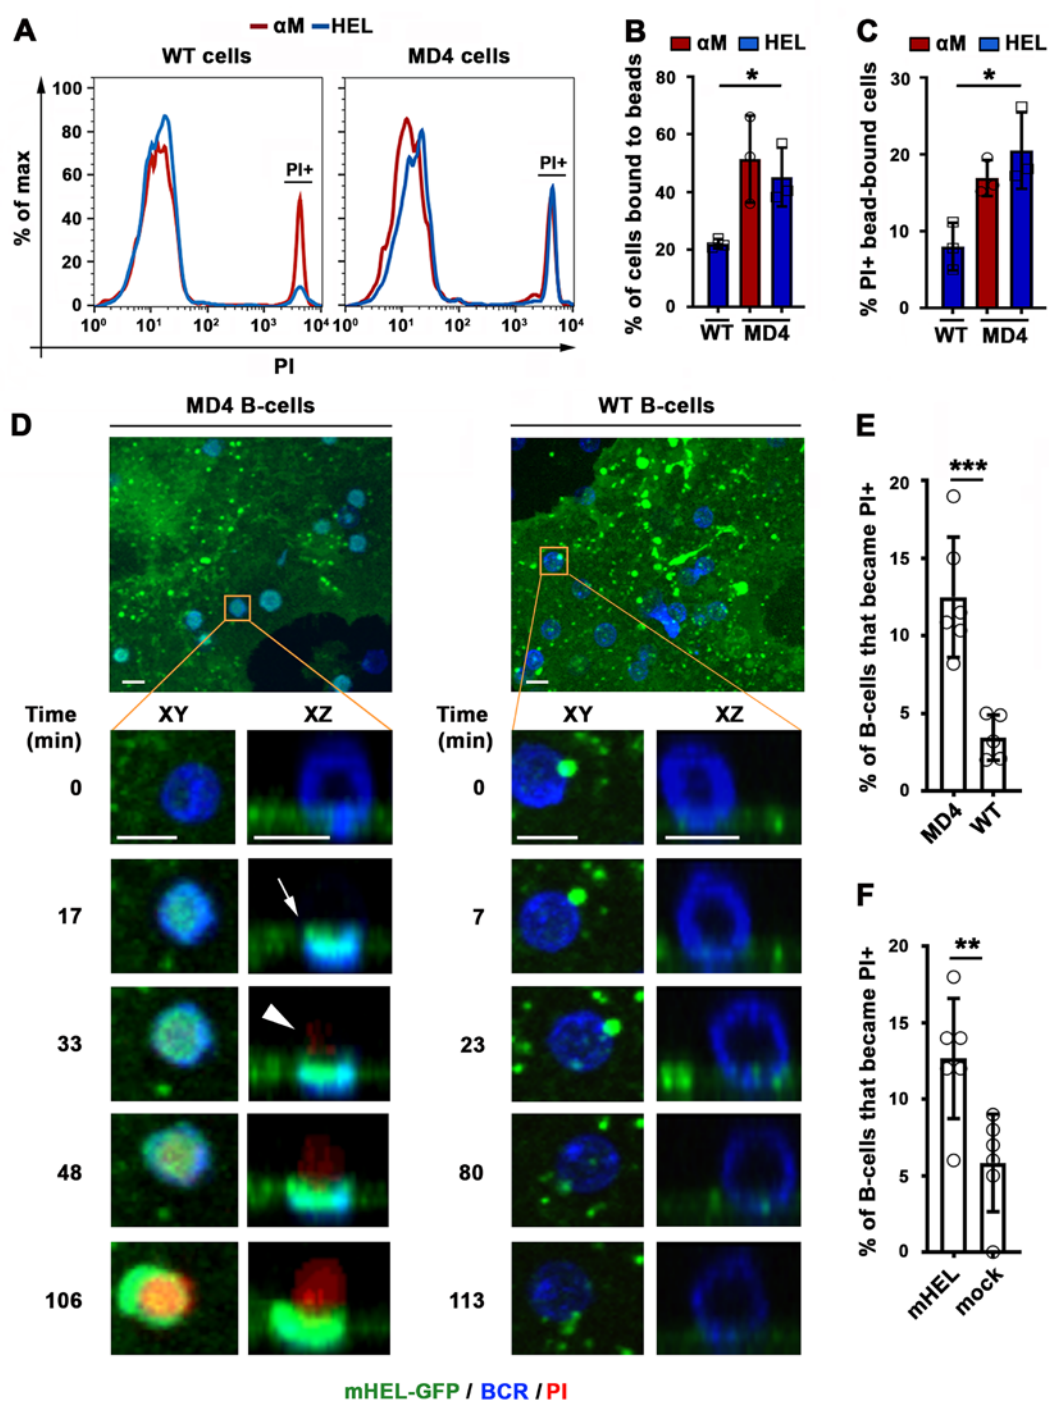

216 **Figure 3. BCR-mediated binding of HEL coupled to beads or expressed as a**  
217 **transmembrane protein on COS-7 cells causes B-cell PM permeabilization. (A)** Histograms  
218 of PI FI in WT or MD4 B-cells incubated with  $\alpha$ M- or HEL-beads for 30 min by flow cytometry.  
219 **(B)** Percentages of WT and MD4 B-cells binding  $\alpha$ M- or HEL-beads. Data points represent  
220 independent experiments (mean  $\pm$  SD). **(C)** Percentages of PI+ bead-bound WT or MD4 B-cells  
221 after 30 min incubation. Data points represent independent experiments (mean  $\pm$  SD). **(D)**  
222 Spinning disk time-lapse images of an MD4 B-cell (left panels) and a WT B-cell (right panels)  
223 interacting with a COS-7 cell expressing mHEL-GFP in the presence of PI (*Videos 6 and 7*).  
224 Arrows, clustering of mHEL-GFP during B-cell binding; arrowheads, intracellular PI. **(E)**  
225 Percentages of PI+ MD4 and WT B-cells interacting with COS-7 cells transfected with mHEL-  
226 GFP. **(F)** Percentages of PI+ MD4 B-cells interacting with COS-7 cells transfected with mHEL-  
227 GFP or mock-transfected. Data points (E and F) represent individual videos from 3~4  
228 independent experiments (mean  $\pm$  SD). Bars, 5  $\mu$ m \* $p$  $\leq$ 0.05, \*\* $p$  $\leq$ 0.01, \*\*\* $p$  $\leq$ 0.005, unpaired  
229 Student's *t*-test or one-way ANOVA.  
230

231 **Antigen-induced B-cell permeabilization requires high-affinity BCR-antigen binding, BCR**  
232 **signaling, and NMII motor activity**

233 High-affinity binding of the BCR to antigen bound to non-internalizable surfaces induces high  
234 levels of BCR signaling, cytoskeleton reorganization, and antigen endocytosis (Batista and  
235 Neuberger 1998; Batista and Neuberger 2000; Fleire *et al.* 2006). To examine the impact of BCR  
236 binding affinity on antigen-induced PM permeabilization, we incubated MD4 B-cells with beads  
237 coated with equal densities of HEL or the duck egg lysozyme isoform DEL-I. The MD4 BCR  
238 binds DEL-I with >100 fold lower affinity than it binds HEL (Langley *et al.* 2017). As expected,  
239 the percentage of B-cells binding multiple beads was reduced when the BCR-antigen affinity  
240 decreased, but B-cells binding one single bead were detected for both HEL and DEL-I, and also  
241 Tf (*Figure 4-figure supplement 1*). In these single bead-bound populations, DEL-I-beads caused  
242 significantly less PI entry than HEL-beads (*Figure 4A*). Inhibition of signaling with the Src  
243 kinase inhibitor PP2 (Cheng *et al.* 2001) (iSrc) or the Bruton's Tyrosine Kinase inhibitor AVL-  
244 292 (Aalipour and Advani 2013) (iBTK) (*Figure 4B and C*) also reduced PI entry in cells  
245 binding HEL-beads (*Figure 4D*). After contact with  $\alpha$ M-PLB or  $\alpha$ M-beads but not Tf-PLB or  
246 Tf-beads, surface BCRs became polarized towards PLB- or bead-binding sites within ~10 min, a  
247 period markedly shorter than what is required for detection of PM permeabilization through FM  
248 influx (*Figure 4E-H, Figure 4-figure supplements 2 and 3, and Video 8*). Importantly, the  
249 activated form of the actin motor protein NMII, detected through its phosphorylated light chain  
250 (pMLC), accumulated along with the BCR at  $\alpha$ M-bead-binding sites (*Figure 4G, Figure 4-figure*  
251 *supplement 3, and Video 9*). The fluorescence intensity ratios (FIR) of surface BCRs and pMLC  
252 were significantly higher in B-cells binding  $\alpha$ M-beads than in cells binding Tf-beads (*Figure 4H*

**Figure 4**

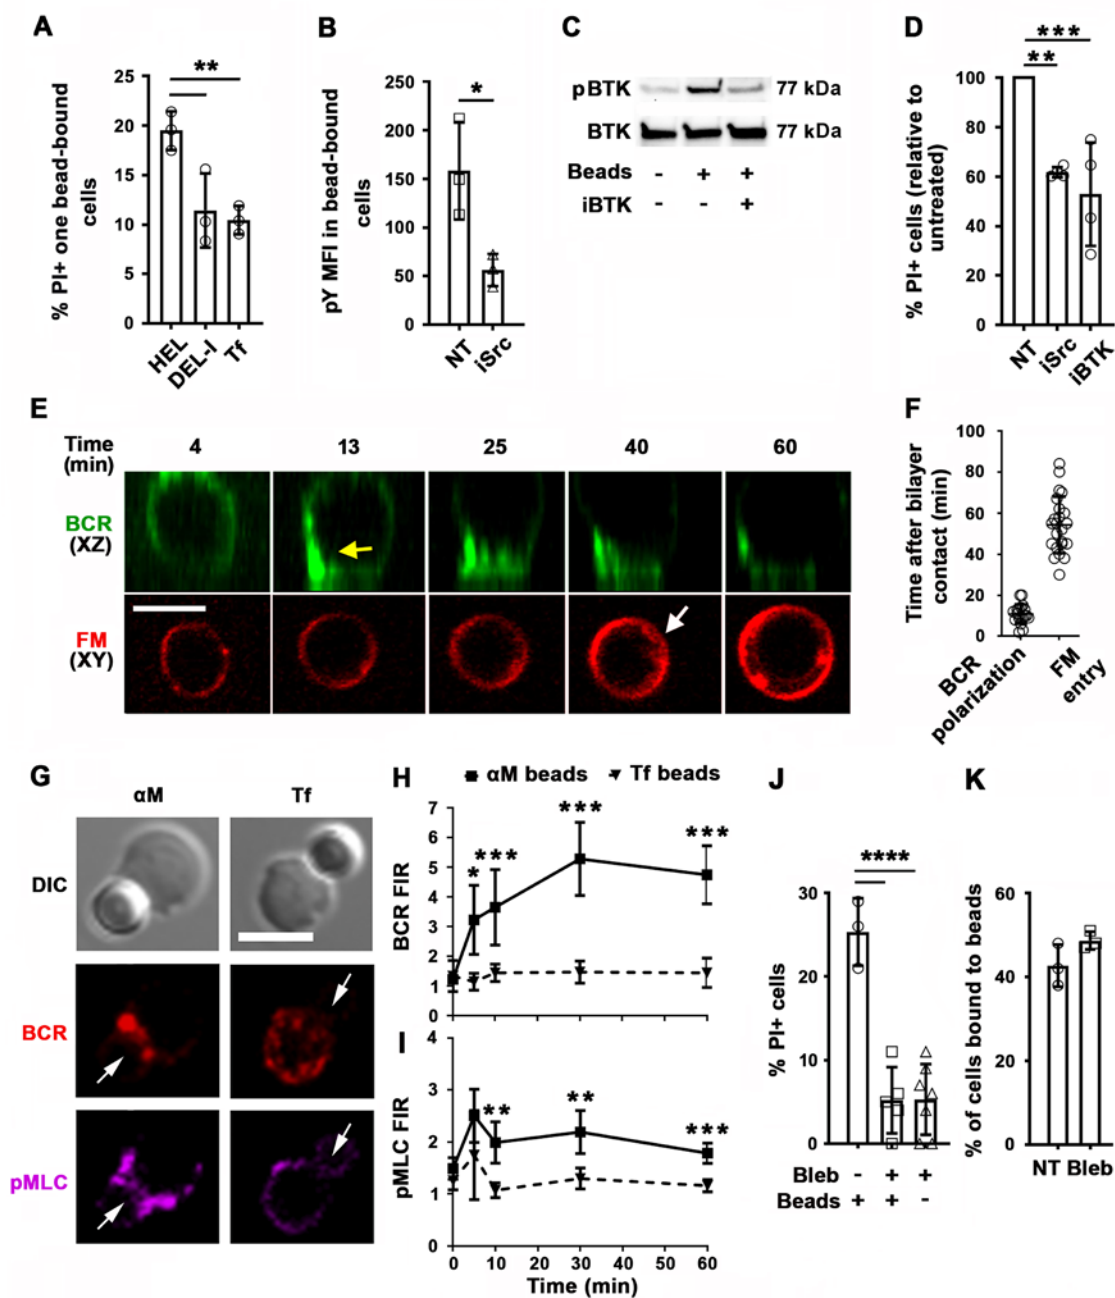



254 **Figure 4. PM permeabilization induced by surface-associated antigen depends on high-**  
255 **affinity BCR-antigen binding, BCR signaling, and non-muscle myosin II (NMII) motor**  
256 **activity. (A)** Percentages of PI<sup>+</sup> single bead-binding B-cells after incubation with HEL-, DEL-I-  
257 or Tf-beads (1:4 cell:bead ratio) for 30 min. Data points represent independent experiments  
258 (mean ± SD). **(B)** Mean fluorescence intensity (MFI) of phosphotyrosine (pY) in HEL-bead-  
259 bound B-cells treated or untreated (NT) with a Src kinase inhibitor (iSrc) by flow cytometry.  
260 Data points represent independent experiments (mean ± SD). **(C)** Western blot analysis of pBTK  
261 and BTK in B-cells incubated with HEL-beads in the presence or absence of a BTK inhibitor  
262 (iBTK) for 30 min. **(D)** Percentages of PI<sup>+</sup> HEL-bead-bound cells treated with iSrc or iBTK  
263 relative to NT at 30 min. Data points represent independent experiments (mean ± SD). **(E)**  
264 Spinning disk time-lapse images of BCR polarization (yellow arrow) in a B-cell incubated with  
265 αM-PLB in the presence of FM4-64 (white arrow, intracellular FM). **(F)** Timing of BCR  
266 polarization and FM entry of individual cells interacting with αM-PLB (*Video 8*). Data points  
267 represent individual cells in three independent experiments (mean ± SD). **(G)** Confocal images  
268 of BCR and phosphorylated NMII light chain (pMLC) staining in B-cells interacting with αM- or  
269 Tf-beads (arrows, bead binding sites). **(H and I)** Mean fluorescence intensity ratio (FIR) of BCR  
270 **(H)** and pMLC **(I)** staining at the bead-binding site relative to the opposite PM in αM- and Tf-  
271 bead-bound cells over time. Data represent the averages of three independent experiments (mean  
272 ± SD). **(J)** Percentages of PI<sup>+</sup> bead-binding B-cells incubated with αM-beads for 30 min in the  
273 presence or absence of blebbistatin (Bleb). Data points represent individual videos from three  
274 independent experiments (mean ± SD). **(K)** Percentages of bead-bound B-cells incubated with  
275 αM-beads for 30 min in the presence or absence of Bleb. Data points represent independent  
276 experiments (mean ± SD). Bar, 5 μm. \* $p \leq 0.05$ , \*\* $p \leq 0.01$ , \*\*\* $p \leq 0.005$ , \*\*\*\* $p \leq 0.001$ , unpaired  
277 Student's *t*-test or one-way ANOVA.

278 **Figure supplement 1.** Impact of BCR-antigen affinity on B-cell-bead binding.

279 **Figure supplement 2.** B-cell binding to αM-PLB but not to Tf-PLB triggers BCR polarization  
280 first and PM permeabilization later.

281 **Figure supplement 3.** BCR and phosphorylated myosin light chain (pMLC) polarize towards  
282 αM-bead binding sites.

283

284 *and I*). Inhibition of NMII motor activity with blebbistatin (Bleb) markedly reduced the number  
285 of B-cells that became PI-positive during interaction with  $\alpha$ M-beads, without affecting the cells'  
286 ability to bind the beads (*Figure 4J and K*). Live-imaging detected PI entry following a “tug-of-  
287 war’ between two B-cells simultaneously engaging an  $\alpha$ M-bead (*Video 3 and Figure 1-figure*  
288 *supplement 1C*), further supporting a role for NMII-mediated traction forces in antigen-induced  
289 PM permeabilization. Thus, our results indicate that PM permeabilization caused by surface-  
290 associated antigen requires strong BCR-antigen interaction and the subsequent activation of  
291 signaling and NMII motor activity.

292

### 293 **Antigen-induced B-cell permeabilization triggers lysosome exocytosis as a repair response**

294 B-cell permeabilization with the pore-forming toxin SLO triggers lysosomal exocytosis (Miller  
295 *et al.* 2015), a response required for sealing PM wounds (Reddy *et al.* 2001). In this study, we  
296 found that B-cells permeabilized during interaction with surface-associated antigen also rapidly  
297 reseal their PM, by utilizing an assay involving sequential exposure to the membrane-  
298 impermeable dyes FM4-64 and SYTOX Blue. Repaired cells were quantified by flow cytometry  
299 as the percentage of permeabilized  $\alpha$ M-bead-binding cells (stained intracellularly with FM4-64  
300 kept throughout the assay) that excluded the membrane-impermeable dye SYTOX Blue (added  
301 only during the last 10 min of the assay) (*Figure 5A*). Inhibition of lysosomal exocytosis with  
302 bromoenol lactone (BEL) (Fensome-Green *et al.* 2007; Tam *et al.* 2010) significantly reduced  
303 the percentage of resealed cells (*Figure 5A and B*) while not increasing the numbers of dead cells  
304 (*Figure 5-figure supplement 1*). These data suggest that lysosomal exocytosis is required for the  
305 resealing of B-cells permeabilized by binding to surface-associated antigen.

306

307

**Figure 5**

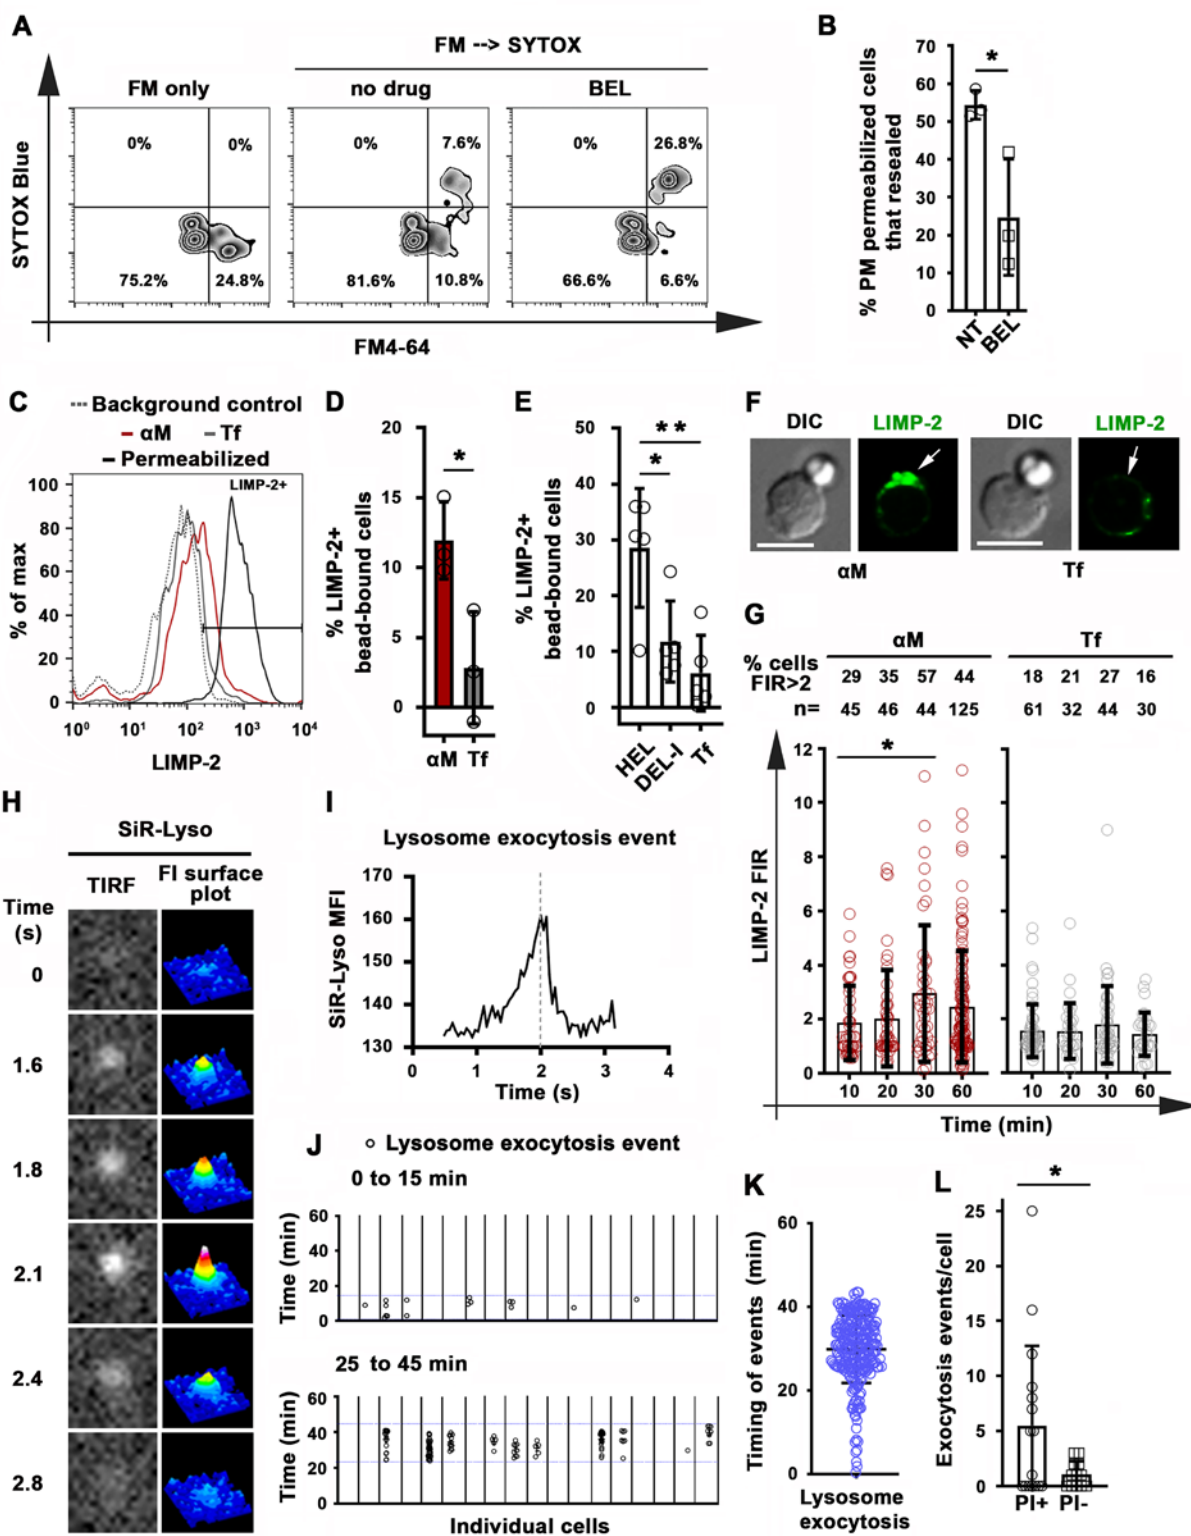

309 **Figure 5. Antigen-induced permeabilization triggers PM repair mediated by lysosomal**  
310 **exocytosis.** (A) Resealed bead-bound B-cells after incubation with  $\alpha$ M-beads were assessed by  
311 flow cytometry analysis of FM4-64 (added at the start) and SYTOX Blue (added in the last 10  
312 min) FI in the presence or absence of BEL. (B) Percentages of permeabilized  $\alpha$ M-bead-bound  
313 cells that resealed in the presence or absence of BEL. Data points represent independent  
314 experiments (mean  $\pm$  SD). (C) Flow cytometry analysis of surface-exposed (no detergent  
315 permeabilization) and/or intracellular LIMP-2 (with detergent permeabilization) of bead-bound  
316 B-cells after incubation with  $\alpha$ M- or Tf-beads for 30 min. (D and E) Percentages of surface-  
317 exposed LIMP-2 (relative to values obtained with secondary antibody alone) in bead-bound B-  
318 cells incubated with  $\alpha$ M- or Tf-beads (D) or with HEL-, DEL-I- or Tf-beads for 30 min (E). Data  
319 points represent independent experiments (mean  $\pm$  SD). (F) Confocal images of surface-exposed  
320 LIMP-2 in B-cells incubated with  $\alpha$ M- or Tf-beads (arrows, bead-binding sites). Bars, 5  $\mu$ m. (G)  
321 FIR (bead-binding site: opposite PM) of surface-exposed LIMP-2 in individual cells over time.  
322 Data points represent individual cells (mean  $\pm$  SD). (H) Total internal reflection microscopy  
323 (TIRF) images (left column) and FI surface plots (right column) of SiR-Lyso at the B-cell  
324 surface contacting  $\alpha$ M-PLB (*Video 10*). (I) Representative MFI versus time plot of a SiR-Lyso-  
325 loaded lysosome undergoing exocytosis. (J) SiR-Lyso exocytosis events (circles) in individual  
326 B-cells during the first 0-15 min or 25-45 min of incubation with  $\alpha$ M-PLB. (K) Times of  
327 individual SiR-Lyso exocytosis events in B-cells incubated with  $\alpha$ M-PLB during a 45 min  
328 incubation. Data points represent individual SiR-Lyso exocytosis events from three independent  
329 experiments (mean  $\pm$  SD). (L) Numbers of SiR-Lyso exocytosis events per B-cell permeabilized  
330 (PI+) or not permeabilized (PI-) by  $\alpha$ M-PLB during a 45 min incubation. Data points represent  
331 individual cells from three independent experiments (mean  $\pm$  SD). \* $p \leq 0.05$ , \*\* $p \leq 0.01$ , unpaired  
332 Student's *t*-test or one-way ANOVA.

333 **Figure supplement 1.** Bromoenol lactone (BEL) does not affect B-cell viability.

334 **Figure supplement 2.** BCR-mediated binding of  $\alpha$ M-beads induces surface exposure of the  
335 LIMP-2 luminal domain at bead contact sites.

336 **Figure supplement 3.** Detection of lysosomal exocytosis by total internal reflection fluorescence  
337 (TIRF) microscopy.

338

339 To determine if permeabilization by surface-associated  $\alpha$ M or HEL triggers exocytosis of  
340 lysosomes in B-cells, we first examined the surface exposure of luminal epitopes of the  
341 lysosomal membrane protein LIMP-2. Flow cytometry analysis detected surface LIMP-2 in a  
342 higher percentage of B-cells binding  $\alpha$ M-beads than in B-cells binding Tf-beads (*Figure 5C and*  
343 *D*). Notably, surface exposure of LIMP-2 was lower in MD4 B-cells binding DEL-I-beads  
344 compared to HEL-beads (*Figure 5E*). These results reveal a close correlation between the extent  
345 of PM permeabilization (*Figure 4A*) and lysosomal exocytosis induced by surface-associated  
346  $\alpha$ M, HEL or DEL-I (*Figure 5D-E*). Surface LIMP-2 was predominantly detected at sites of  $\alpha$ M-  
347 bead binding (*Figure 5F and Figure 5-figure supplement 2*) and this polarized pattern, measured  
348 by FIR, increased after ~30 min of interaction with  $\alpha$ M- but not Tf-beads (*Figure 5G*). Notably,  
349 this timeframe was similar to the period required for PM permeabilization (*Figure 2E*). Next, we  
350 performed live total internal reflection fluorescence (TIRF) microscopy of B-cells preloaded  
351 with the luminal lysosomal probe SiR-Lyso (a membrane-permeable fluorescent peptide that  
352 binds the lysosomal enzyme cathepsin D) while contacting  $\alpha$ M-PLB. Exocytosis events were  
353 identified by rises in the fluorescence intensity of SiR-Lyso puncta (reflecting lysosome entry  
354 into the TIRF evanescent field adjacent to the PM) followed by sharp decreases within ~2 s  
355 (reflecting dye dispersion upon fusion of lysosomes with the PM) (*Figure 5H and I, Figure 5-*  
356 *figure supplement 3, and Video 10*). Exocytosis events were observed in the majority of  
357 individual PI-positive cells interacting with  $\alpha$ M-PLB (*Figure 5J*) and occurred predominantly  
358 ~30-45 min after  $\alpha$ M-PLB contact (*Figure 5J and K*), a timing similar to PM permeabilization  
359 and LIMP-2 exposure. Importantly, lysosomal exocytosis events were significantly more  
360 frequent in permeabilized B-cells when compared to B-cells that remained intact (*Figure 5L*).

361 Thus, permeabilization of B-cells by surface-associated antigen triggers localized lysosomal  
362 exocytosis at antigen-BCR interaction sites as a PM repair response.

363

364 **B-cell permeabilization and lysosomal exocytosis facilitate internalization and presentation**  
365 **of surface-associated antigen**

366 We investigated the relationship between PM permeabilization by surface-associated antigen and  
367 antigen internalization using fluorescent  $\alpha$ M covalently bound to beads or tethered to PLB. Live-  
368 cell imaging detected  $\alpha$ M puncta moving away from bead-binding sites into B-  
369 cells, increasing progressively between 30 and 60 min of interaction (*Figure 6A and B and Video*  
370 *11*). In contrast, intracellular fluorescent puncta were markedly less abundant during the same  
371 time period in cells not binding  $\alpha$ M-beads, or binding Tf-beads (*Figure 6B*). Inhibition of  
372 antigen-mediated PM permeabilization with blebbistatin significantly reduced the extraction and  
373 internalization of  $\alpha$ M coupled to beads (*Figure 6C*). When similar experiments were performed  
374 with PLB, the fraction of cells containing internalized  $\alpha$ M and the total amount of  $\alpha$ M uptake  
375 were significantly higher in permeabilized cells with high levels of intracellular FM staining  
376 (FM-high), compared to non-permeabilized cells with low intracellular FM staining (FM-low)  
377 (*Figure 6D-F*). Collectively, these data suggest that  $\alpha$ M-induced PM permeabilization, rapidly  
378 followed by lysosomal exocytosis, promotes extraction and internalization of  $\alpha$ M from non-  
379 internalizable surfaces.

380

381 Next, we investigated whether antigen internalization enhanced by PM permeabilization and  
382 lysosomal exocytosis impacts antigen presentation by B-cells. We compared levels of IL-2  
383 secretion by the 3A9 T-cell hybridoma line (Allen and Unanue 1984) after activation by B-cells



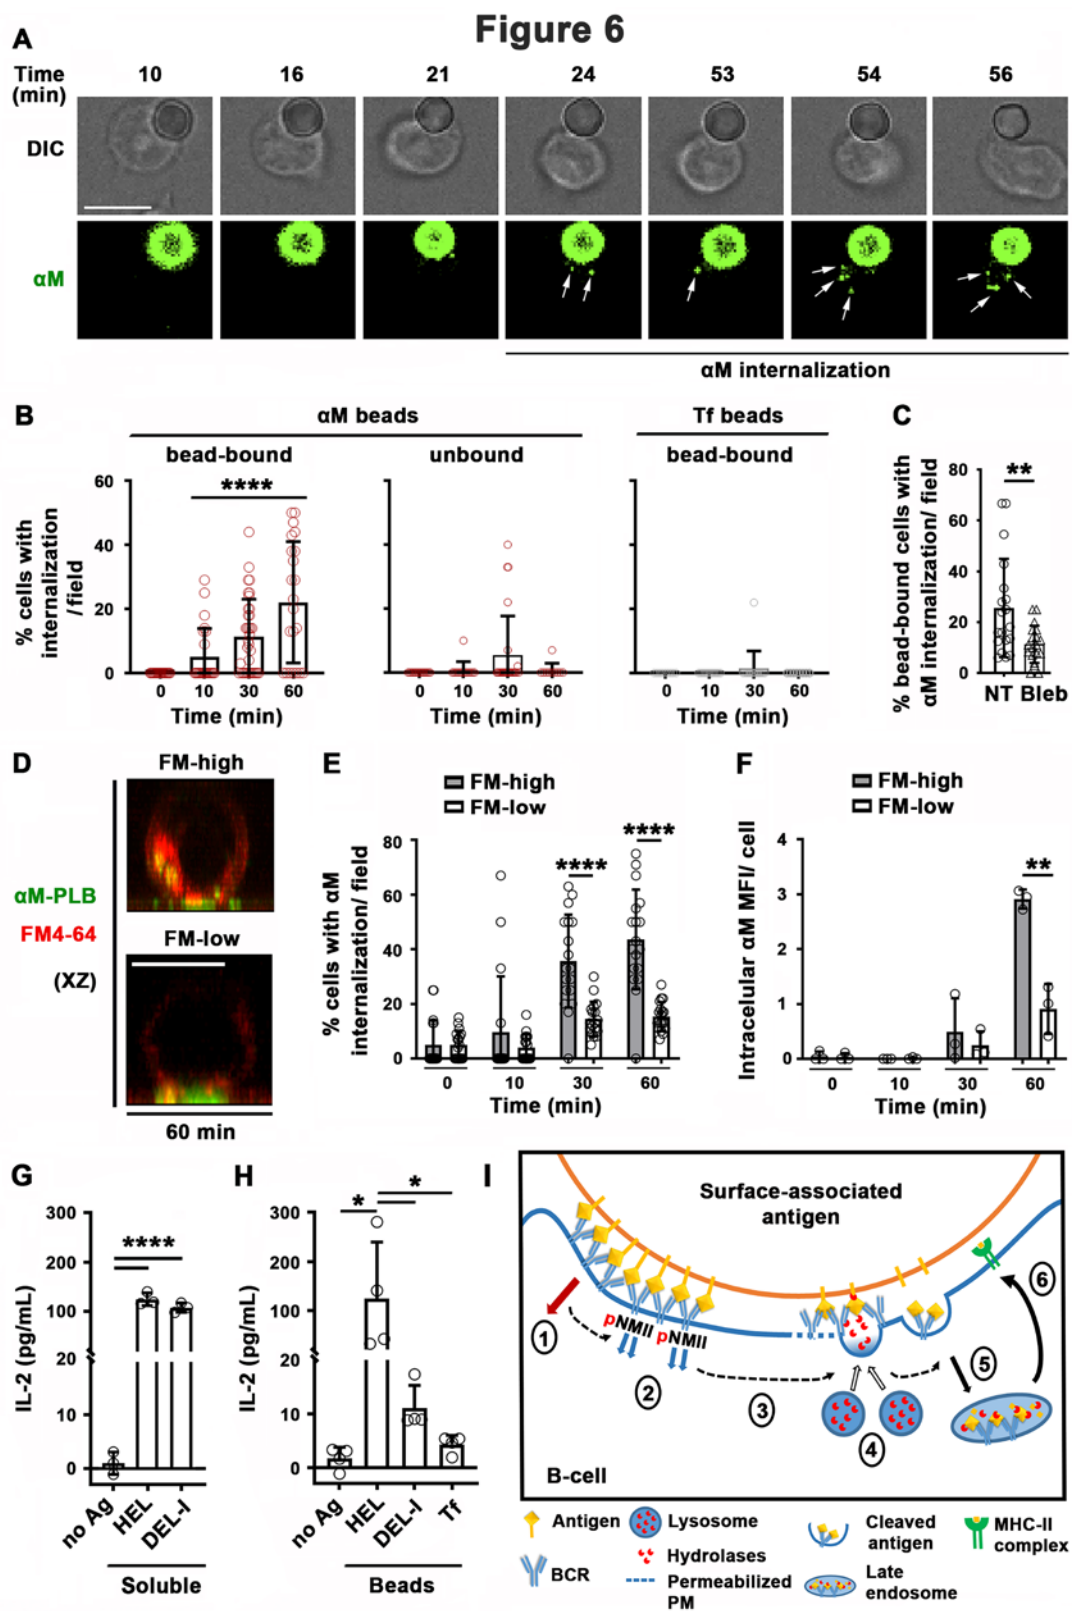

385 **Figure 6. Antigen-induced PM permeabilization promotes antigen internalization and**  
386 **presentation.** (A) Confocal live imaging of a B-cell interacting with fluorescent  $\alpha$ M-beads  
387 (arrows, internalized  $\alpha$ M). (B) Percentages of cells containing internalized  $\alpha$ M or Tf, bound or  
388 not to  $\alpha$ M- or Tf-beads, over time. Data points represent individual fields in three independent  
389 experiments (mean  $\pm$  SD). (C) Percentages of bead-bound B-cells with internalized  $\alpha$ M in the  
390 presence or absence of Bleb after 60 min incubation. Data points represent individual fields in  
391 three independent experiments (mean  $\pm$ SD). (D) Confocal images (xz) of  $\alpha$ M internalization in  
392 B-cells permeabilized (FM-high) or not permeabilized (FM-low) by  $\alpha$ M-PLB after 60 min  
393 incubation. (E) Percentages of B-cells, permeabilized (FM-high) or not permeabilized (FM-low)  
394 by  $\alpha$ M-PLB, containing internalized  $\alpha$ M over time. Data points represent individual fields in  
395 three independent experiments (mean  $\pm$  SD). (F) Average values of the mean fluorescence  
396 intensity (MFI) of internalized  $\alpha$ M in individual B-cells permeabilized (FM-high) or not  
397 permeabilized (FM-low) by  $\alpha$ M-PLB over time. Data points represent independent experiments  
398 (mean  $\pm$  SD). (G) IL-2 secretion by 3A9 T-cells activated by B-cells incubated with or without  
399 (no Ag) soluble HEL or DEL-I (10  $\mu$ g/ml) for 72 h. Data points represent independent  
400 experiments (mean  $\pm$  SD). (H) IL-2 secretion by 3A9 T-cells activated by B-cells incubated with  
401 or without HEL-, DEL-I- or Tf-beads (1:4 cell:bead ratio) for 72 h. Bar, 5  $\mu$ m. Data points  
402 represent independent experiments (mean  $\pm$  SD). \* $p \leq 0.05$ , \*\* $p \leq 0.01$ , \*\*\*\* $p \leq 0.0001$ , unpaired  
403 Student's *t*-test or one-way ANOVA. (I) Cartoon depicting a working model for the  
404 spatiotemporal relationship of events initiated by the interaction of the BCR with surface-  
405 associated antigen. High-affinity binding stabilizes BCR-antigen bonds and induces strong BCR  
406 signaling (1) and NMII activation (2). Activated NMII generates local traction forces that  
407 permeabilize the PM (3), which triggers a localized PM repair response mediated by lysosomal  
408 exocytosis. Lysosome exocytosis releases hydrolases that can cleave antigen off surfaces (4),  
409 facilitating endocytosis (5) and presentation to T-cells (6).



410 exposed to HEL- or DEL-I-beads. B-cells exposed to high concentrations of soluble HEL or  
411 DEL-I induced similar levels of IL-2 secretion (*Figure 6G*), demonstrating that the primary B-  
412 cells used in these assays could process and present the conserved peptide present in both HEL  
413 and DEL-I for T-cell activation. In contrast, when the B-cells were exposed to lower amounts of  
414 surface-associated antigens, B-cells exposed to HEL-beads activated T-cells to produce IL-2 at  
415 markedly higher levels than cells exposed to DEL-I-beads (*Figure 6H*). These results indicate  
416 that B-cell permeabilization resulting from high-affinity antigen-BCR interaction, with its  
417 corresponding lysosomal exocytosis response, facilitates the presentation of antigen associated  
418 with non-internalizable surfaces.

419

## 420 **Discussion**

421 Extracellular release of lysosomal enzymes by B-cells was previously proposed to cleave  
422 antigens tightly associated with non-internalizable surfaces, facilitating their internalization and  
423 presentation to T-cells (Yuseff *et al.* 2011; Spillane and Tolar 2017). However, it was unclear  
424 which mechanism was responsible for inducing lysosomal enzyme release when B-cells engaged  
425 insoluble antigen. In this study, we show that interaction of the BCR with surface-associated  
426 antigen can permeabilize the B-cell PM, triggering lysosomal exocytosis as part of the PM repair  
427 response (Rodríguez *et al.* 1997; Reddy *et al.* 2001). Antigen-dependent PM permeabilization  
428 occurs at antigen-binding sites, and is reversible under conditions that allow lysosomal  
429 exocytosis. We further demonstrate that PM permeabilization and lysosomal exocytosis require  
430 high-affinity binding of the BCR to antigen, BCR signaling, and activation of NMII motor  
431 activity, and that this process facilitates antigen internalization, processing and presentation.  
432 Thus, our study identifies a critical novel step in the affinity-dependent process by which B-cells

433 capture antigen tightly associated with surfaces, for effective internalization and subsequent  
434 presentation to T-cells.

435

436 Capture and internalization of antigen tightly associated with surfaces is an immunologically  
437 important process, as B-cells encounter this type of antigen *in vivo* on parasites, bacteria and  
438 viruses, as well as immune cells such as follicular dendritic cells. Follicular dendritic cells  
439 capture antigen drained into lymph nodes and present it on their surface to germinal center B-  
440 cells. In this manner, follicular dendritic cells enhance BCR antigenic stimulation by increasing  
441 antigen avidity, in addition to providing costimulatory molecules (Natarajan *et al.* 2001). While  
442 the exact percentage is unknown, studies have suggested that the majority of antigens that B-  
443 cells encounter *in vivo* are in a membrane-associated form (Batista and Harwood 2009).

444 Importantly, the capture, internalization, and presentation of such surface-associated antigens to  
445 T-cells play a critical role in selecting specific B-cells for survival, clonal expansion, and  
446 differentiation into long-lived high-affinity memory B-cells and antibody-secreting cells (Gitlin  
447 *et al.* 2014).

448

449 We found that B-cell PM permeabilization induced by surface-associated antigen depends on the  
450 motor activity of NMII. Following BCR polarization, activated NMII accumulates at sites of B-  
451 cell binding to  $\alpha$ M- or HEL-beads or PLB before PM permeabilization occurs. These findings  
452 are consistent with previous studies showing that internalization of surface-associated but not  
453 soluble antigen requires NMII-mediated traction forces at antigen-binding sites (Natkanski *et al.*  
454 2013; Spillane and Tolar 2018). Collectively, our results support the notion that NMII-mediated  
455 traction forces generated during BCR-antigen interaction are responsible for permeabilization of

456 the B-cell PM. Whether this permeabilization is due to tearing of the lipid bilayer (Andrews *et al.*  
457 2014) or the opening of mechanosensitive membrane channels (Liu *et al.* 2018; Liu and Ganguly  
458 2019) is currently unknown. However, B-cell resealing was inhibited when lysosomal  
459 exocytosis, a component of the PM repair response, was blocked (Reddy *et al.* 2001).  
460 Furthermore, Endophilin A2, a protein that facilitates PM repair (Corrotte *et al.* 2020), also  
461 contributes to BCR-mediated internalization of membrane-associated antigen (Malinova *et al.*  
462 2020). Finally, three different membrane-impermeable probes, PI, FM lipophilic dyes, and  
463 Ponceau 4R, gained access to the cytosol after B-cell interaction with surface-associated antigen.  
464 These results together strongly suggest that NMII-mediated membrane tearing is the mechanism  
465 underlying antigen-dependent B-cell PM permeabilization.

466

467 We were initially surprised to detect B-cell PM permeabilization during BCR-mediated binding  
468 of antigen tightly associated to surfaces, a process known to generate myosin-mediated forces as  
469 a mechanism to capture antigen. To confirm that such an event does occur, we utilized three  
470 different methods to detect PM permeabilization, two types of antigen, and three types of  
471 presenting surfaces. All generated similar results. We first detected B-cell permeabilization  
472 during interaction with surface-associated antigen by following the entry of membrane-  
473 impermeable DNA-binding or lipophilic dyes. While these compounds bind to different  
474 intracellular structures, both showed sudden rather than gradual increases in intracellular  
475 staining, consistent with PM permeabilization and not dye endocytosis. To strengthen these  
476 results, we designed an independent assay based on the ability of Ponceau 4R to enter B-cells  
477 and quench the fluorescence of CFSE, a widely used live-cell dye that covalently labels cytosolic  
478 molecules without affecting cell viability. Ponceau 4R has been used to reduce the extracellular

479 background of fluorescence-based assays because it is membrane-impermeable and potentially  
480 quenches the emission of fluorophores in the 490-560 nm range (Tay *et al.* 2019). We found that  
481 Ponceau 4R influx rapidly quenches the fluorescence of CFSE-labeled B-cells, providing us with  
482 an independent and accurate tool to determine the kinetics of antigen-induced PM  
483 permeabilization. We also found that two different model antigens,  $\alpha$ M and HEL (pseudo and  
484 *bona fide*, respectively), can induce B-cell PM permeabilization when attached to surfaces. This  
485 shows that BCR binding through *bona fide* antigen-binding sites is not a requirement for  
486 generation of the mechanical forces leading to B-cell PM permeabilization. Finally, since  
487 stiffness of the antigen-presenting surface appears to impact BCR signaling and antigen capture  
488 (Spillane and Tolar 2017; J. Wang *et al.* 2018), it could be argued that antigen tethered to latex  
489 beads or PLB assembled on glass coverslips represent unnaturally stiff surfaces that might cause  
490 B-cell permeabilization. To investigate this issue, we utilized COS-7 cells expressing mHEL, a  
491 surface-associated antigen previously shown to engage MD4 B cells *in vivo* when expressed in  
492 mouse models (Hartley *et al.* 1991). Our finding that BCR engagement of mHEL on the surface  
493 of COS-7 cells also induces PM permeabilization supports the notion that this process occurs  
494 under physiological conditions and is likely to be relevant *in vivo*.

495  
496 Not all B-cells binding surface-associated antigen were permeabilized, possibly due to the  
497 heterogeneity of the primary B-cell population used in our assays. Splenic B-cells are present at  
498 different stages of peripheral maturation and differentiation (Sagaert and De Wolf-Peeters 2003;  
499 Allman and Pillai 2008), thereby binding antigen with variable affinities at different times, and  
500 generating distinct responses. It will be interesting to examine further which subsets of B-cells

501 are more effective in capturing and presenting surface-associated antigen through NMII-  
502 dependent PM permeabilization.  
503  
504 The rapid exocytosis of lysosomes triggered by B-cell permeabilization uncovered in our study  
505 provides a mechanistic explanation for the previously reported affinity-dependent extraction and  
506 presentation of antigen associated with non-internalizable surfaces (Batista and Neuberger 2000).  
507 We showed that the low affinity DEL-I induces markedly lower levels of PM permeabilization,  
508 lysosome exocytosis, and antigen presentation than the high affinity HEL, when the two antigens  
509 are displayed on surfaces at similar densities. Surface association significantly enhances the  
510 avidity of antigens by increasing their valency, a process that can reduce the impact of BCR-  
511 binding affinity on BCR signaling, antigen internalization, and presentation when compared to  
512 soluble forms of the same antigen. However, this avidity effect is primarily observed with  
513 antigen associated with surfaces that B-cells are able to internalize (Batista and Neuberger 2000),  
514 and it is known that B-cell subsets such as native follicular B-cells have very low phagocytic  
515 capacity (Vidard *et al.* 1996). We envision that when antigen is strongly associated with non-  
516 internalizable surfaces, low-affinity BCR-antigen interactions are disrupted before B-cells can  
517 extract antigen. In this scenario, high-affinity BCR interactions would be critical for sustaining  
518 antigen binding under NMII-mediated traction forces, to promote PM permeabilization,  
519 lysosomal enzyme release, and antigen extraction. High-affinity BCR-antigen binding is also  
520 expected to induce more robust signaling than low-affinity binding, enabling higher levels of  
521 NMII activation (Fleire *et al.* 2006; Natkanski *et al.* 2013) and polarization to drive PM  
522 permeabilization. Collectively, in addition to supporting the notion that tight antigen attachment  
523 to non-internalizable surfaces facilitates B-cell affinity discrimination, our results expand the

524 mechanistic understanding of why different physical and chemical forms (size, solubility,  
525 geometry, and molecular patterns) of immunogens impact the efficacy of vaccines (Bachmann  
526 and Jennings 2010; Khan *et al.* 2015).

527  
528 Our study also provides important insight into the spatiotemporal relationship of events initiated  
529 by interaction of the BCR with surface-associated antigen (*Figure 6I*). Our results suggest that  
530 high-affinity binding stabilizes BCR-antigen bonds, inducing strong BCR signaling and NMII  
531 activation to locally generate traction forces that permeabilize the PM. Ca<sup>2+</sup> entry then triggers a  
532 localized PM repair response mediated by lysosomal exocytosis, releasing hydrolases that can  
533 cleave antigen off surfaces, facilitating endocytosis and presentation to T-cells. Thus, our results  
534 support the notion that B-cells utilize a cellular mechanism that evolved for surviving PM injury  
535 to promote the acquisition, presentation, and possibly affinity discrimination of surface-  
536 associated antigens.

537

## 538 **Materials and Methods**

539 Key resources table

| Reagent type (species) or resource                                           | Designation                                            | Source or reference  | Identifiers | Additional information |
|------------------------------------------------------------------------------|--------------------------------------------------------|----------------------|-------------|------------------------|
| Primary cell (spleen - C57BL/6)                                              | WT                                                     | Jackson Laboratories | 000664      |                        |
| Primary cell (spleen - C57BL/6-Tg(IghelMD4)4Ccg/J)                           | MD4                                                    | Jackson Laboratories | 002595      |                        |
| Primary cell (spleen B10.BR-H2 <sup>K2</sup> H2-T18 <sup>a</sup> /SgSnJJrep) | B10.BR-H2 <sup>K2</sup> H2-T18 <sup>a</sup> /SgSnJJrep | Jackson Laboratories | 004804      |                        |
| Cell line ( <i>Mus musculus</i> )                                            | A20                                                    | ATCC                 | TIB-208     | B-cell lymphoma        |
| Cell line ( <i>Mus musculus</i> )                                            | 3A9                                                    | ATCC                 | CRL-3293    | T-cell hybridoma       |

|                                                |                                                                               |                                               |             |                                             |
|------------------------------------------------|-------------------------------------------------------------------------------|-----------------------------------------------|-------------|---------------------------------------------|
| Cell line<br>( <i>Cercopithecus aethiops</i> ) | COS-7                                                                         | ATCC                                          | CRL-1651    | Kidney fibroblasts                          |
| Reagent                                        | Latex NH <sub>2</sub> -beads                                                  | Polysciences                                  | 17145-5     |                                             |
| Ligand                                         | $\alpha$ M (F(ab') <sub>2</sub> goat-anti-mouse IgM+G)                        | Jackson Immune Research                       | 115-006-068 | Binds to BCR                                |
| Antigen                                        | HEL (Hen egg lysozyme)                                                        | Sigma-Aldrich                                 | L6876       | Binds to BCR from MD4 mice                  |
| Antigen                                        | DEL-1 (Duck egg lysozyme)                                                     | David B. Langley and Daniel Christ laboratory |             | Binds to BCR from MD4 mice                  |
| Ligand                                         | Tf (Holo- transferrin)                                                        | Sigma-Aldrich                                 | T0665-50MG  | Binds to transferrin receptor               |
| Ligand                                         | AF488- $\alpha$ M                                                             | Jackson Immune Research                       | 115-546-003 | Binds to BCR                                |
| Ligand                                         | AF488-Tf                                                                      | Thermo Fisher Scientific                      | T13342      | Binds to transferrin receptor               |
| Commercial kit                                 | BCA kit                                                                       | Thermo Fisher Scientific                      | 23235       | Protein measurement during bead preparation |
| Control for antigen                            | Biotinylated transferrin (Tf-PLB)                                             | Sigma-Aldrich                                 | T3915-5MG   |                                             |
| Reagent                                        | Streptavidin-conjugated Yellow-Green latex beads                              | Polyscience                                   | 24159-1     |                                             |
| Ligand                                         | Biotin-SP (long spacer)-conjugated Fab fragments of goat-anti-mouse IgG (H+L) | Jackson Immune Research                       | 115-067-003 |                                             |
| Inhibitor                                      | Bleb (Blebbistatin)                                                           | Sigma-Aldrich                                 | B0560       | 50 $\mu$ M                                  |
| Antibody                                       | anti-phosphotyrosine mAb 4G10                                                 | Millipore                                     | 05-321      | 1:500                                       |
| Antibody                                       | AF488-goat-anti-mouse IgG <sub>2b</sub>                                       | Thermo Fisher Scientific                      | A-21141     |                                             |
| Reagent                                        | PI (Propidium iodide)                                                         | Sigma-Aldrich                                 | P4170-10MG  | 50 $\mu$ g/ml                               |
| Reagent                                        | FMI-43FX                                                                      | Thermo Fisher Scientific                      | F35355      | 10 $\mu$ g/ml                               |

|                |                                                                                        |                          |                  |                                                                                                                   |
|----------------|----------------------------------------------------------------------------------------|--------------------------|------------------|-------------------------------------------------------------------------------------------------------------------|
| Reagent        | FM4-64FX                                                                               | Thermo Fisher Scientific | F34653           | 10 µg/ml                                                                                                          |
| Reagent        | SYTOX™ Blue nucleic acid stain                                                         | Invitrogen               | S11348           | 300 nM                                                                                                            |
| Inhibitor      | Staurosporine                                                                          | Abcam                    | 120056           | Apoptosis induction (1 µM)                                                                                        |
| Antibody       | Cleaved Caspase-3 (Asp175) Antibody                                                    | Cell Signaling           | 9661T            | 1:500                                                                                                             |
| Antibody       | Cy5-Fab donkey-anti mouse IgG                                                          | Jackson ImmunoResearch   | 715-175-151      | 5 µg/ml                                                                                                           |
| Antibody       | Donkey anti-Rabbit IgG (H+L) Highly cross-adsorbed secondary antibody, Alexa Fluor 488 | Thermo Fisher Scientific | A-21206          | 1:200                                                                                                             |
| Inhibitor      | PP2                                                                                    | Millipore-Sigma          | 529573           | Src kinase inhibitor (5 µM)                                                                                       |
| Inhibitor      | AVL-292                                                                                | Selleckchem              | S7173            | BTK inhibitor (10 nM)                                                                                             |
| Antibody       | anti-BTK                                                                               | Cell Signaling           | 8547             | 1:1000                                                                                                            |
| Antibody       | Rabbit anti-phospho-BTK                                                                | Abcam                    | 68217            | 1:500                                                                                                             |
| Antibody       | HRP goat-anti-rabbit                                                                   | Jackson Immune Research  | 111-035-144      | 1:1000                                                                                                            |
| Antibody       | Cy3-Fab donkey-anti-mouse IgM+G                                                        | Jackson Immune Research  | 115-165-166      | 1:200                                                                                                             |
| Antibody       | Rabbit anti-phosphorylated myosin light chain (pMLC)                                   | Cell Signaling           | 3671S            | 1:50                                                                                                              |
| Antibody       | AF633-goat-anti-rabbit IgG                                                             | Invitrogen               | A-21070          | 1:500                                                                                                             |
| Inhibitor      | BEL (Bromo-enol lactone)                                                               | Sigma-Aldrich            | B1552            | 12 µM                                                                                                             |
| Commercial kit | SiR-Lysosome and Verapamil                                                             | Cytoskeleton             | CY-SC012         | Lysosome probe 1 µM and 10 µM                                                                                     |
| Antibody       | Rabbit-anti-LIMP-2                                                                     | Sigma-Aldrich            | SAB3500449-100UG | 1:200                                                                                                             |
| Antibody       | AF488 donkey-anti-rabbit IgG                                                           | Life technology          | A32790           | 1:200                                                                                                             |
| Commercial kit | IL-2 ELISA kit                                                                         | Biologend                | 431804           |                                                                                                                   |
| Software       | FlowJo 10.1                                                                            | FlowJo, LLC              |                  | <a href="https://www.flowjo.com/solutions/flowjo/downloads">https://www.flowjo.com/solutions/flowjo/downloads</a> |



|          |                                                          |                          |          |                                                                                                                                                                                                                                                                         |
|----------|----------------------------------------------------------|--------------------------|----------|-------------------------------------------------------------------------------------------------------------------------------------------------------------------------------------------------------------------------------------------------------------------------|
| Software | Volocity Suite                                           | PerkinElmer              |          | <a href="https://ir.perkinelmer.com/news-releases/news-release-details/perkinelmer-launches-volocityr-60-high-performance-3d-cellular">https://ir.perkinelmer.com/news-releases/news-release-details/perkinelmer-launches-volocityr-60-high-performance-3d-cellular</a> |
| Software | NIH Image J                                              |                          |          | <a href="https://imagej.nih.gov/ij/">https://imagej.nih.gov/ij/</a>                                                                                                                                                                                                     |
| Software | MATLAB                                                   | MathWorks                |          | <a href="https://www.mathworks.com/products/matlab.html">https://www.mathworks.com/products/matlab.html</a>                                                                                                                                                             |
| Software | Prism                                                    | GraphPad                 |          | <a href="https://www.graphpad.com/scientific-software/prism/">https://www.graphpad.com/scientific-software/prism/</a>                                                                                                                                                   |
| Antibody | Anti-CD90.2                                              | Biolegend                | 105310   | 1 $\mu$ l/ $2 \times 10^6$ cells                                                                                                                                                                                                                                        |
| Reagent  | Guinea pig complement                                    | Innovative Research      | IGGPCSER | 100 $\mu$ l/ $4 \times 10^7$ cells                                                                                                                                                                                                                                      |
| Reagent  | 1,2-dioleoyl-sn-glycero-3-phosphocholine                 | Avanti Polar Lipids      | 850375P  | 5 mM (PLB)                                                                                                                                                                                                                                                              |
| Reagent  | 1,2-dioleoyl-sn-glycero-3-phosphoethanolamine-cap-biotin | Avanti Polar Lipids      | 870273C  | 50 $\mu$ M (PLB)                                                                                                                                                                                                                                                        |
| Reagent  | Ponceau 4R                                               | Sigma-Aldrich            | 18137    | 1 mM                                                                                                                                                                                                                                                                    |
| Reagent  | CFSE                                                     | Thermo Fisher Scientific | C34553   | 1 $\mu$ M                                                                                                                                                                                                                                                               |
| Reagent  | Lipofectamine 3000                                       | Thermo Fisher Scientific | L3000008 |                                                                                                                                                                                                                                                                         |
| Reagent  | Bovine fibronectin                                       | Millipore                | 341631   | 5 mg/ml                                                                                                                                                                                                                                                                 |

540

#### 541 **Mice, B-cell isolation and culture**

542 Primary B-cells were isolated from the spleens of wild type C57BL/6, MD4 transgenic  
543 (C57BL/6 background), B10.BR- $H2^{k2}$   $H2-T18^a$ /SgSnJJrep (Jackson Laboratories), and F1 of  
544 B10.BR- $H2^{k2}$   $H2-T18^a$ /SgSnJJrep x MD4 mice using a previously published protocol (Miller *et*  
545 *al.* 2015). Briefly, mononuclear cells were isolated by Ficoll density-gradient centrifugation  
546 (Sigma-Aldrich). T-cells were removed with anti-mouse CD90.2 mAb (BD Biosciences) and  
547 guinea pig complement (Innovative Research, Inc.) and monocytes and dendritic cells by

548 panning. B-cells were kept at 37°C and 5% CO<sub>2</sub> before and during experiments. All procedures  
549 involving mice were approved by the Institutional Animal Care and Usage Committee of the  
550 University of Maryland.

551 The A20 B-cell lymphoma line (ATCC #TIB-208) was cultured in DMEM (Lonza)  
552 supplemented with 10% of FBS (Thermo Fisher Scientific), 0.05 mM 2-mercaptoethanol  
553 (Sigma-Aldrich), 10 mM MOPS, 100 units/ml penicillin, and 100 µg/ml streptomycin (Gemini)  
554 at 37°C and 5% CO<sub>2</sub>. The 3A9 T-cell hybridoma line (ATCC #CRL-3293) was cultured in  
555 DMEM (ATCC) supplemented with 5% FBS (Thermo Fisher Scientific), 0.05 mM 2-  
556 mercaptoethanol (Sigma-Aldrich) at 37°C and 5% CO<sub>2</sub>.

557

#### 558 **Antigen-coated beads**

559 Latex NH<sub>2</sub>-beads (3 µm diameter, 3.5 x 10<sup>8</sup> beads/preparation, Polyscience) were activated with  
560 8% glutaraldehyde in 0.5 ml PBS for 120 min under rotation at room temperature, washed with  
561 PBS, and incubated overnight with equal molar amounts of F(ab')<sub>2</sub> goat-anti-mouse IgM+G  
562 (αM, 20 µg/ml, Jackson ImmunoResearch Laboratories), hen egg lysozyme (HEL, 5.8 µg/ml,  
563 Sigma-Aldrich), duck egg lysozyme (DEL)-I (Langley *et al.* 2017), holo-transferrin (Tf, 32  
564 µg/ml, Sigma-Aldrich), Alexa Fluor (AF) 488-conjugated Tf (AF488-Tf, 32 µg/ml, Thermo  
565 Fisher Scientific), or AF488-F(ab')<sub>2</sub> goat-anti-mouse IgM+G (AF488-αM, 20 µg/ml, Jackson  
566 ImmunoResearch Laboratories) in 1 ml PBS. Protein content determination (BCA, Thermo  
567 Fisher Scientific) of coupling solutions before and after bead incubation confirmed that similar  
568 molar amounts of protein were conjugated in each case. The beads were then blocked with PBS  
569 1% BSA in PBS for 30 min under rotation, washed to remove unconjugated proteins, counted in  
570 a Neubauer chamber and stored at 4°C in PBS containing 1% BSA and 5% glycerol.

571 Streptavidin-conjugated Yellow-Green latex beads (2  $\mu\text{m}$  diameter,  $5 \times 10^8$  beads/preparation,  
572 Polyscience) were washed with 1% BSA in PBS and incubated with Biotin-SP (long spacer)-  
573 conjugated Fab fragments of goat-anti-mouse IgG (H+L) (40  $\mu\text{g}$  of biotinylated antibody/mg of  
574 beads, Jackson ImmunoResearch Laboratories) for 30 min at 4°C, washed, counted in a  
575 Neubauer chamber and stored at 4°C in PBS containing 1% BSA and 5% glycerol.

576

### 577 **Antigen-coated planar lipid bilayers (PLB)**

578 PLB were prepared as previously described (Dustin *et al.* 2007; Liu *et al.* 2012; Spillane and  
579 Tolar 2017). Briefly, liposomes were generated from 5 mM 1,2-dioleoyl-sn-glycero-3-  
580 phosphocholine plus 1,2-dioleoyl-sn-glycero-3-phosphoethanolamine-cap-biotin (Avanti Polar  
581 Lipids) at a 100:1 molar ratio by sonication. Eight-well coverslip chambers (Lab-Tek) were  
582 incubated with liposomes for 20 min at room temperature and washed with PBS. The chambers  
583 were then incubated with 1  $\mu\text{g}/\text{ml}$  streptavidin (Jackson ImmunoResearch Laboratories) for 10  
584 min, washed, and incubated with 10  $\mu\text{g}/\text{ml}$  mono-biotinylated Fab' goat-anti-IgM+G ( $\alpha\text{M}$ -PLB)  
585 (Liu *et al.* 2012) or the same molar amount of biotinylated Tf (16  $\mu\text{g}/\text{ml}$ , Sigma-Aldrich) (Tf-  
586 PLB) for 10 min at room temperature.

587

### 588 **COS-7 cells expressing membrane hen egg lysozyme-GFP (mHEL-GFP)**

589 COS-7 cells were transiently transfected with mHEL-GFP (Batista *et al.* 2001) (plasmid kindly  
590 provided by Dr. Michael Gold, University of British Columbia) using Lipofectamine 3000  
591 (Thermo Fisher Scientific) and a published protocol (J.C. Wang *et al.* 2018), and used for  
592 experiments 24 h post-transfection.

593

594 **Flow cytometry analysis of PM permeabilization**

595 Mouse splenic B-cells were incubated with beads coated with  $\alpha$ M, HEL, DEL-I or Tf in DMEM  
596 containing 6 mg/ml BSA (DMEM-BSA) at a cell:bead ratio of 1:2 (or as indicated), or with  
597 soluble F(ab')<sub>2</sub> goat-anti-mouse IgM+G ( $\alpha$ M, 0.5  $\mu$ g/ml) for 30 min at 37°C with 5% CO<sub>2</sub>.  
598 Propidium iodide (PI, Sigma-Aldrich) was present during the 37°C incubation as an indicator of  
599 PM permeabilization. Cells were then analyzed by flow cytometry (BD FACSCanto II) at 10,000  
600 cell counts/sample. Bead-bound cells were identified based on their forward (FSC)- and side-  
601 scattering (SSC) properties and fluorescence intensity (FI) when using fluorescent beads (*Figure*  
602 *1-figure supplement 2*). The percentages of PI-positive (PI+) cells among the bead-bound cell  
603 populations were quantified using FlowJo 10.1 software.

604

605 **Live-cell imaging of PM permeabilization**

606 To assess PM permeabilization by protein-coated beads, mouse splenic B-cells or a B-cell line  
607 (A20) were incubated for 30 min at 4°C in 35 mm glass-bottom dishes (MatTek) coated with  
608 poly-lysine and then with protein-coated beads at a cell to bead ratio of 1:2 for another 30 min at  
609 4°C. Cells were washed with DMEM-BSA and imaged in a Live Cell System chamber  
610 (Pathology Devices) at 37°C with 5% CO<sub>2</sub> in the presence of 50  $\mu$ g/ml PI (Sigma-Aldrich) with  
611 or without 50  $\mu$ M blebbistatin (Sigma-Aldrich). Images were acquired for 60 min at 1 frame/15-  
612 30 s using a spinning disk confocal microscope (UltraVIEW VoX, PerkinElmer with a 63X 1.4  
613 N.A. oil objective). Images were analyzed using Volocity Suite (PerkinElmer) and NIH ImageJ.  
614 More than 200 cells from 3 independent experiments were analyzed for each condition.

615 To analyze PM permeabilization by protein-coated PLB, splenic B-cells were incubated  
616 with FM1-43FX or FM4-64FX (Thermo Fisher Scientific) in DMEM-BSA for 5 min at 4°C,

617 added to coverslip chambers containing mono-biotinylated Fab' goat-anti-IgM+G or biotinylated  
618 Tf tethered to PLB, and imaged immediately at 37°C with 5% CO<sub>2</sub> in the presence of 50 µg/ml  
619 PI and/or 10 µg/ml FM1-43FX or FM4-64FX (Thermo Fisher Scientific) using a spinning disk  
620 confocal microscope (UltraVIEW VoX, PerkinElmer with a 63X 1.4 N.A. oil objective). Images  
621 were acquired at 1 frame/6-10 s and analyzed using Volocity (PerkinElmer) and NIH ImageJ.  
622 For quantitative analysis, the mean fluorescence intensity (MFI) of FM1-43FX or FM4-64FX in  
623 a defined area was measured using Volocity (PerkinElmer). More than 270 cells from 3  
624 independent experiments were analyzed for each condition.

625 To analyze PM permeabilization by Ponceau 4R quenching, B-cells were pre-stained  
626 with 1 µM CFSE (Thermo Fisher Scientific) for 10 min at 37°C and washed with DMEM. Cells  
627 were then incubated with αM- or Tf -PLB and analyzed by a spinning disk confocal microscope  
628 (UltraVIEW VoX, PerkinElmer with a 40X 1.4 N.A. oil objective) in the presence or absence of  
629 1 mM of Ponceau 4R (Sigma-Aldrich). More than 480 cells from 4 independent experiments  
630 were analyzed for each condition. To validate this method, cells pre-stained with CFSE were  
631 incubated with or without 800 ng/ml SLO in the presence or absence of 1 mM Ponceau 4R  
632 (Sigma-Aldrich) for 10 min and analyzed by flow cytometry (BD FACSCanto II) at 10,000 cell  
633 counts/sample.

634 To analyze PM permeabilization by antigen presented on the cell surface, COS-7 cells  
635 mock-transfected or transfected with mHEL-GFP were seeded onto fibronectin-coated coverslips  
636 and cultured for 24 h. WT or MD4 B-cells pre-stained with AF674-conjugated Fab fragments of  
637 donkey-anti-mouse IgM+G (Jackson ImmunoResearch Laboratories) were added to the COS-7  
638 cell coverslips in the presence of 50 µg/ml PI and imaged immediately at 37°C and 5% CO<sub>2</sub>  
639 using a spinning disk confocal microscope (UltraVIEW VoX, PerkinElmer with a 40X 1.3 N.A.

640 oil objective). Images were acquired at 1 frame/20s and analyzed using NIH ImageJ software.

641 More than 240 cells from 3 independent experiments were analyzed for each condition.

642

### 643 **Cleaved caspase-3 detection**

644 Splenic B-cells were pretreated or not with 1  $\mu$ M staurosporine (Abcam) for 24 h at 37°C in

645 DMEM-BSA to induce apoptosis (Diaz *et al.* 2004), exposed to  $\alpha$ M- or Tf-beads for 30 min at

646 37°C, washed, fixed with 4% paraformaldehyde (PFA), blocked with 1% BSA, and

647 permeabilized with 0.05% saponin. Cells were then incubated with antibodies specific for

648 cleaved caspase-3 (Asp175) (Cell Signaling Technology) followed by AF488 donkey-anti-rabbit

649 IgG (Life Technologies) and analyzed by flow cytometry (BD FACSCanto II) at 10,000 cell

650 counts/sample. The percentages of cells with cleaved caspase-3 staining were determined using

651 FlowJo 10.1 software.

652

### 653 **BCR signaling**

654 BCR signaling was analyzed using both flow cytometry and western blotting. For flow

655 cytometry assays, splenic B-cells from MD4 mice were pretreated or not with 5  $\mu$ M of the Src

656 kinase inhibitor PP2 (Millipore) (Cheng *et al.* 2001) for 30 min at 37°C (conditions selected not

657 to cause B-cell toxicity) and then incubated with HEL-beads in the presence or not of the

658 inhibitor at 37°C for 30 min. Cells were fixed with 4% PFA, permeabilized with 0.05% saponin,

659 incubated with mouse anti-phosphotyrosine mAb (4G10, Millipore) followed by AF488-goat-

660 anti-mouse IgG<sub>2b</sub> (Thermo Fisher Scientific) secondary antibodies, and analyzed by flow

661 cytometry (BD FACSCanto II) at 10,000 cell counts/sample. The data were analyzed using

662 FlowJo 10.1 software.

663 For western blot assays, splenic B-cells from MD4 mice were pretreated or not with 10  
664 nM of the BTK inhibitor AVL-292 (Selleckchem) (Aalipour and Advani 2013) for 30 min at  
665 37°C (conditions selected not to cause B-cell toxicity) and incubated with HEL-beads in the  
666 presence or not of the inhibitor at 37°C for 30 min. Cells were then lysed using RIPA buffer (150  
667 mM NaCl<sub>2</sub>, 1% of NP40, 0.5% Sodium deoxycholate, 0.1% SDS, 50 mM Tris, pH 8.0)  
668 containing protease and phosphatase inhibitors (50 mM NaF, 1 mM Na<sub>3</sub>VO<sub>4</sub> and 10 mM  
669 Na<sub>4</sub>P<sub>2</sub>O<sub>7</sub>) at 4°C. Cell lysates were run in 4-20% gradient SDS-PAGE gels (Bio-Rad) (5x10<sup>6</sup>  
670 cells/ lane) and transferred (Bio-Rad Trans-Blot transfer system) to PVDF membranes  
671 (Millipore). The membranes were blotted with rabbit anti-phospho-BTK (pBTK; Abcam) or anti-  
672 BTK (Cell Signaling Technology) followed by HRP-anti-rabbit antibodies (Jackson  
673 ImmunoResearch Laboratories) and visualization using ECL substrate (Bio-Rad) and imaging  
674 (iBright FL-1500, (Thermo Fisher Scientific).

675 To check if signaling affected PM permeabilization, splenic B-cells from MD4 mice were  
676 pretreated or not with 5 μM PP2 (Cheng *et al.* 2001) or 10 nM AVL-292 (Aalipour and Advani  
677 2013) for 30 min at 37°C and then incubated with HEL-beads in the presence or not of the  
678 inhibitor and 50 μg/ml PI (Sigma-Aldrich) at 37°C for 30 min. The percentage of PI+ cells was  
679 expressed relative to the untreated condition.

680

### 681 **BCR and NMII polarization**

682 BCRs on the surface of mouse splenic B-cells were stained with Cy3-Fab donkey-anti-mouse  
683 IgM+G (Jackson ImmunoResearch Laboratories) for 30 min at 4°C. Cells were then incubated  
684 with αM- or Tf-beads at 4°C for 30 min and 37°C for different lengths of time. Cells were fixed  
685 with 4% PFA, permeabilized with 0.05% saponin, and incubated with rabbit anti-phosphorylated

686 myosin light chain 2 (pMLC2) antibodies (Cell Signaling Technology) to label activated NMII  
687 (Bresnick 1999), followed by AF633-goat-anti-rabbit IgG (Invitrogen). Cells were analyzed by  
688 confocal fluorescence microscopy (Zeiss LSM710 with a 63X 1.4 N.A. oil objective). The  
689 percentages of cells with polarization of surface labeled BCRs and activated NMII towards bead-  
690 binding sites were quantified by visual inspection. More than 300 cells from 3 independent  
691 experiments were analyzed for each condition.

692

### 693 **PM repair assay**

694 Mouse splenic B-cells were pretreated or not with 12  $\mu$ M bromoenol lactone (BEL, Sigma-  
695 Aldrich) in DMEM-BSA for 30 min at 37°C before and during assays, to inhibit lysosomal  
696 exocytosis and PM repair (Fensome-Green *et al.* 2007). Cells were then incubated with  $\alpha$ M-  
697 beads (1:2 cell-bead ratio) with or without inhibitors at 4°C for 5 min and 37°C for 30 min in the  
698 presence of FM4-64FX (Thermo Fisher Scientific) to stain wounded cells. Cells were then  
699 incubated with SYTOX<sup>TM</sup> Blue nucleic acid stain (300 nM, Invitrogen) at 4°C for 10 min to  
700 stain cells that failed to repair PM wounds during the 30 min incubation. Cells were analyzed by  
701 flow cytometry (BD FACSCanto II) at 10,000 cell counts/sample. Cells that were FM4-64FX  
702 positive but SYTOX Blue negative were identified as permeabilized cells that resealed. The  
703 percentages of resealed cells among all bead-bound permeabilized cells were quantified using  
704 FlowJo 10.1 software.

705

### 706 **BCR polarization in relation to permeabilization**

707 Surface BCRs of splenic B-cells were labeled with Cy5-Fab donkey-anti mouse IgG (Jackson  
708 ImmunoResearch) at 4°C for 30 min. Cells were incubated with  $\alpha$ M-PLB in the presence of FM



709 4-64FX (Thermo Fisher Scientific) and imaged immediately at 37°C with 5% CO<sub>2</sub> using a  
710 confocal spinning disk confocal microscope (UltraVIEW VoX, PerkinElmer with a 60X 1.4 N.A.  
711 oil objective). Images were acquired at 1 frame/20 s for 60 min and analyzed using a custom-  
712 made MATLAB script (MathWorks) and NIH ImageJ software. BCR polarization was analyzed  
713 using maximal projection of XZ images and quantified by the MFI ratio between defined regions  
714 within the bottom half (closer to PLB) and the top half (away from PLB) of individual cells.  
715 Cells with bottom to top ratios  $\geq 2$  were considered polarized. More than 20 cells from 3  
716 independent experiments were analyzed.

717

### 718 **Lysosome exocytosis**

719 To detect LIMP-2 exposed on the cell surface, splenic B-cells (C57BL/6 or MD4) were  
720 incubated with  $\alpha$ M-, HEL-, DEL-I or Tf-beads for 30 min at 37°C, cooled to 4°C, and incubated  
721 with rabbit-anti-LIMP-2 antibodies (Sigma-Aldrich) for 60 min at 4°C. Cells were then washed  
722 and fixed with 4% PFA, washed, blocked with 1% BSA in PBS and incubated with AF488  
723 donkey-anti-rabbit IgG (Life Technologies) secondary antibodies. For intracellular LIMP-2  
724 staining, B-cells were fixed with 4% PFA, washed, permeabilized with 0.05% saponin for 20  
725 min, and incubated with rabbit anti-LIMP-2 antibodies followed by AF488 donkey-anti-rabbit  
726 IgG. Flow cytometry (BD FACSCanto II) was performed at 10,000 cell counts/sample. Cells  
727 were also analyzed by confocal fluorescence microscopy (Leica SPX5 with a 63X 1.4 N.A. oil  
728 objective). Polarization of LIMP-2 towards bound beads was quantified by calculating the  
729 fluorescence intensity ratio (FIR) of anti-LIMP-2 at the B-cell-bead contact site relative to the  
730 opposite side of the cell PM, using NIH ImageJ and a custom-made MATLAB script  
731 (MathWorks).

732 Individual events of lysosome exocytosis were captured using total internal reflection  
733 fluorescence (TIRF). Splenic B-cells were preloaded with SiR-Lysosome (1  $\mu$ M, Cytoskeleton)  
734 in the presence of verapamil (10  $\mu$ M, Cytoskeleton) for 30 min at 37°C. Cells were added to  
735 coverslip chambers containing mono-biotinylated Fab' goat anti-IgM+G tethered to PLB and  
736 imaged at 37°C with 5% CO<sub>2</sub> in the presence of PI (50  $\mu$ g/ml, Sigma-Aldrich) using a TIRF  
737 microscope (NIKON Eclipse Ti-E TIRF, 63X 1.49NA oil objective). Images were acquired at 8  
738 frames/s during 15-20 min intervals of the 45 min incubation and analyzed using NIH ImageJ  
739 and Nikon NIS Elements software. Increases in the FI of individual SiR-Lysosome puncta  
740 (reflecting lysosome movement within the TIRF evanescent field towards the PM in contact with  
741 PLB) followed by sharp decreases within a period of 1-2 s (corresponding to a loss of the SiR-  
742 Lysosome signal upon PM fusion) were scored as exocytosis events (Jaiswal *et al.* 2004). More  
743 than 20 cells were analyzed in 4 independent experiments.

744

#### 745 **Antigen internalization**

746 For live-imaging of antigen internalization, splenic B-cells were incubated with AF488- $\alpha$ M-  
747 beads (1:4 cell to bead ratio) in the presence of 1  $\mu$ M SiR-Lysosome and 10  $\mu$ M verapamil for 30  
748 min at 4°C, washed with DMEM-BSA and imaged by confocal fluorescence microscopy (Leica  
749 SPX5 with a 63X 1.4 N.A. oil objective) for 60 min at 1 frame/min at 37°C. Live time-lapse  
750 images were analyzed using NIH ImageJ.

751 For fixed cell imaging, splenic B-cells were pretreated or not with 50  $\mu$ M blebbistatin on  
752 poly-lysine coated slides for 30 min at 4°C and incubated with AF488- $\alpha$ M beads or AF488-Tf-  
753 beads at 37°C for varying lengths of time in the presence or not of 50  $\mu$ M blebbistatin. After  
754 fixation with 4% PFA, cells were imaged by confocal fluorescence microscopy (Zeiss LSM710

755 with a 63X 1.4 N.A. oil objective). Percentages of cells with intracellularly-located AF488- $\alpha$ M  
756 puncta were determined by visual inspection of images. More than 200 cells from 3 independent  
757 experiments were analyzed for each condition.

758 For live-imaging of B-cells interacting with PLB, mouse splenic B-cells were added to  
759 coverslip chambers containing PLB coated with AF488-conjugated mono-biotinylated Fab' goat-  
760 anti-mouse IgM+G and incubated at 37°C with 5% CO<sub>2</sub> in the presence of 10  $\mu$ g/ml FM 4-64FX  
761 (Thermo Fisher Scientific) for varying lengths of time. Samples were then moved to 4°C for 5  
762 min and immediately imaged using a confocal microscope (Leica SPX5 with a 63X 1.4 N.A. oil  
763 objective). Internalization of antigen was quantified by determining the percentages of cells with  
764 intracellularly-located AF488-Fab' goat-anti-mouse IgM+G puncta in each field and by  
765 measuring the AF488 FI associated with intracellular puncta in individual cells, using a custom-  
766 made MATLAB (MathWorks) script. Cells with high FM staining were identified as wounded  
767 and those with low FM staining as unwounded. More than 15 fields or ~90 cells from 3  
768 independent experiments (high or low FM staining) were analyzed for each condition.

769

## 770 **Antigen presentation and T-cell activation**

771 To detect antigen presentation to T-cells, splenic B-cells from F1 mice of a crossing between  
772 B10.BR-*H2<sup>k2</sup>* *H2-TI8<sup>a</sup>*/SgSnJJrep and MD4 mice were co-cultured with 3A9 T-cell hybridoma  
773 cells (ATCC<sup>®</sup> CRL-3293<sup>™</sup>) at equal concentrations ( $3.5 \times 10^6$  cells/ml). Cells were incubated in  
774 DMEM supplemented with 5% FBS and 0.05 mM 2-mercaptoethanol for 72 h in the presence or  
775 not of soluble HEL or DEL-I (10  $\mu$ g/ml), or of beads coated with HEL, DEL-I or Tf (1:4 cell to  
776 bead ratio). After incubation, the concentration of IL-2 in the supernatant was measured using an  
777 IL-2 ELISA kit (Biolegend).

778

## 779 **Statistical analysis**

780 Statistical significance was assessed using unpaired, two-tailed Student's *t*-tests (Prism -  
781 GraphPad software) when only two groups were compared, and one-way ANOVA when 3 or  
782 more groups were compared. All data were presented as the mean  $\pm$  SD (standard deviation).

783

## 784 **Acknowledgments**

785 We thank Dr. A. Upadhyaya (Department of Physics, University of Maryland) for TIRF  
786 microscopy equipment and advice, A. Beaven (CBMG Imaging Core, University of Maryland)  
787 and K. Class (CBMG Flow Cytometry Core, University of Maryland) for assistance with  
788 confocal microscopy and flow cytometry, Drs. S. K. Pierce and M. Akkaya (NIH) for the 3A9 T-  
789 cell hybridoma, B. Mitra and J. Jensen (University of Maryland) for SLO expression and  
790 purification, Dr. Michael Gold for providing the mHEL-GFP DNA construct, and members of  
791 the Song and Andrews laboratories for helpful discussions. This work was supported by the NIH  
792 grant R01 GM064625 to NWA and WS and NIH grant T32 GM080201 to JHvH.

793

## 794 **References**

795 Aalipour, A. and Advani, R.H. (2013) Bruton tyrosine kinase inhibitors: a promising novel  
796 targeted treatment for B cell lymphomas, *Br J Haematol*, 163(4), 436-43.

797 Allen, P.M. and Unanue, E.R. (1984) Differential requirements for antigen processing by  
798 macrophages for lysozyme-specific T cell hybridomas, *J Immunol*, 132(3), 1077-9.

799 Allman, D. and Pillai, S. (2008) Peripheral B cell subsets, *Curr Opin Immunol*, 20(2), 149-57.

- 800 Andrews, N.W., Almeida, P.E. and Corrotte, M. (2014) Damage control: cellular mechanisms of  
801 plasma membrane repair, *Trends in Cell Biology*, 24(12), 734-42.
- 802 Bachmann, M.F. and Jennings, G.T. (2010) Vaccine delivery: a matter of size, geometry,  
803 kinetics and molecular patterns, *Nat Rev Immunol*, 10(11), 787-96.
- 804 Bansal, D., Miyake, K., Vogel, S.S., Groh, S., Chen, C.C., Williamson, R., McNeil, P.L. and  
805 Campbell, K.P. (2003) Defective membrane repair in dysferlin-deficient muscular dystrophy,  
806 *Nature*, 423(6936), 168-72.
- 807 Batista, F.D. and Harwood, N.E. (2009) The who, how and where of antigen presentation to B  
808 cells, *Nat Rev Immunol*, 9(1), 15-27.
- 809 Batista, F.D., Iber, D. and Neuberger, M.S. (2001) B cells acquire antigen from target cells after  
810 synapse formation, *Nature*, 411(6836), 489-94.
- 811 Batista, F.D. and Neuberger, M.S. (1998) Affinity dependence of the B cell response to antigen:  
812 a threshold, a ceiling, and the importance of off-rate, *Immunity*, 8(6), 751-9.
- 813 Batista, F.D. and Neuberger, M.S. (2000) B cells extract and present immobilized antigen:  
814 implications for affinity discrimination, *EMBO J*, 19(4), 513-20.
- 815 Bresnick, A.R. (1999) Molecular mechanisms of nonmuscle myosin-II regulation, *Curr Opin*  
816 *Cell Biol*, 11(1), 26-33.
- 817 Cheng, P.C., Brown, B.K., Song, W. and Pierce, S.K. (2001) Translocation of the B cell antigen  
818 receptor into lipid rafts reveals a novel step in signaling, *J Immunol*, 166(6), 3693-701.
- 819 Corrotte, M., Cerasoli, M., Maeda, F.Y. and Andrews, N.W. (2020) Endophilin-A2-dependent  
820 tubular endocytosis promotes plasma membrane repair and parasite invasion, *J Cell Sci*, 134(5).

- 821 Cyster, J.G. (2010) B cell follicles and antigen encounters of the third kind, *Nat Immunol*,  
822 11(11), 989-96.
- 823 Demonbreun, A.R., Fallon, K.S., Oosterbaan, C.C., Bogdanovic, E., Warner, J.L., Sell, J.J.,  
824 Page, P.G., Quattrocchi, M., Barefield, D.Y. and McNally, E.M. (2019) Recombinant annexin  
825 A6 promotes membrane repair and protects against muscle injury, *J Clin Invest*, 129(11), 4657-  
826 4670.
- 827 Diaz, D., Prieto, A., Barcenilla, H., Monserrat, J., Prieto, P., Sánchez, M.A., Reyes, E.,  
828 Hernandez-Fuentes, M.P., de la Hera, A., Orfao, A. and Alvarez-Mon, M. (2004) Loss of lineage  
829 antigens is a common feature of apoptotic lymphocytes, *J Leukoc Biol*, 76(3), 609-15.
- 830 Dustin, M.L., Starr, T., Varma, R. and Thomas, V.K. (2007) Supported planar bilayers for study  
831 of the immunological synapse, *Curr Protoc Immunol*, Chapter 18, Unit 18.13.
- 832 Fensome-Green, A., Stannard, N., Li, M., Bolsover, S. and Cockcroft, S. (2007) Bromoenol  
833 lactone, an inhibitor of Group VI A calcium-independent phospholipase A2 inhibits antigen-  
834 stimulated mast cell exocytosis without blocking Ca<sup>2+</sup> influx, *Cell Calcium*, 41(2), 145-53.
- 835 Fleire, S.J., Goldman, J.P., Carrasco, Y.R., Weber, M., Bray, D. and Batista, F.D. (2006) B cell  
836 ligand discrimination through a spreading and contraction response, *Science*, 312(5774), 738-41.
- 837 Fuchs, H. and Gessner, R. (2002) Iodination significantly influences the binding of human  
838 transferrin to the transferrin receptor, *Biochim Biophys Acta*, 1570(1), 19-26.
- 839 Gitlin, A.D., Shulman, Z. and Nussenzweig, M.C. (2014) Clonal selection in the germinal centre  
840 by regulated proliferation and hypermutation, *Nature*, 509(7502), 637-40.

- 841 Gonzalez, S.F., Degn, S.E., Pitcher, L.A., Woodruff, M., Heesters, B.A. and Carroll, M.C.  
842 (2011) Trafficking of B cell antigen in lymph nodes, *Annu Rev Immunol*, 29, 215-33.
- 843 Hartley, S.B., Crosbie, J., Brink, R., Kantor, A.B., Basten, A. and Goodnow, C.C. (1991)  
844 Elimination from peripheral lymphoid tissues of self-reactive B lymphocytes recognizing  
845 membrane-bound antigens, *Nature*, 353(6346), 765-9.
- 846 Ibata, K., Kono, M., Narumi, S., Motohashi, J., Kakegawa, W., Kohda, K. and Yuzaki, M.  
847 (2019) Activity-Dependent Secretion of Synaptic Organizer Cbln1 from Lysosomes in Granule  
848 Cell Axons, *Neuron*, 102(6), 1184-1198.e10.
- 849 Jaiswal, J.K., Chakrabarti, S., Andrews, N.W. and Simon, S.M. (2004) Synaptotagmin VII  
850 restricts fusion pore expansion during lysosomal exocytosis, *PLoS Biol*, 2(8), E233.
- 851 Khan, F., Porter, M., Schwenk, R., DeBot, M., Saudan, P. and Dutta, S. (2015) Head-to-Head  
852 Comparison of Soluble vs. Q $\beta$  VLP Circumsporozoite Protein Vaccines Reveals Selective  
853 Enhancement of NANP Repeat Responses, *PLoS One*, 10(11), e0142035.
- 854 Langley, D.B., Crossett, B., Schofield, P., Jackson, J., Zeraati, M., Maltby, D., Christie, M.,  
855 Burnett, D., Brink, R., Goodnow, C. and Christ, D. (2017) Structural basis of antigen  
856 recognition: crystal structure of duck egg lysozyme, *Acta Crystallogr D Struct Biol*, 73(Pt 11),  
857 910-920.
- 858 Liu, C., Miller, H., Orłowski, G., Hang, H., Upadhyaya, A. and Song, W. (2012) Actin  
859 reorganization is required for the formation of polarized B cell receptor signalosomes in response  
860 to both soluble and membrane-associated antigens, *J Immunol*, 188(7), 3237-46.

- 861 Liu, C.S.C. and Ganguly, D. (2019) Mechanical Cues for T Cell Activation: Role of Piezo1  
862 Mechanosensors, *Crit Rev Immunol*, 39(1), 15-38.
- 863 Liu, C.S.C., Raychaudhuri, D., Paul, B., Chakrabarty, Y., Ghosh, A.R., Rahaman, O., Talukdar,  
864 A. and Ganguly, D. (2018) Cutting Edge: Piezo1 Mechanosensors Optimize Human T Cell  
865 Activation, *J Immunol*, 200(4), 1255-1260.
- 866 Malinova, D., Wasim, L., Engels, N. and Tolar, P. (2020) Endophilin A2 regulates B cell protein  
867 trafficking and humoral responses, bioRxiv, <https://doi.org/10.1101/2020.04.20.050419>
- 868 McNeil, P.L., Miyake, K. and Vogel, S.S. (2003) The endomembrane requirement for cell  
869 surface repair, *Proc Natl Acad Sci U S A*, 100(8), 4592-7.
- 870 Miller, H., Castro-Gomes, T., Corrotte, M., Tam, C., Maugel, T.K., Andrews, N.W. and Song,  
871 W. (2015) Lipid raft-dependent plasma membrane repair interferes with the activation of B  
872 lymphocytes, *J Cell Biol*, 211(6), 1193-205.
- 873 Naegeli, K.M., Hastie, E., Garde, A., Wang, Z., Keeley, D.P., Gordon, K.L., Pani, A.M., Kelley,  
874 L.C., Morrissey, M.A., Chi, Q., Goldstein, B. and Sherwood, D.R. (2017) 'Cell Invasion In Vivo  
875 via Rapid Exocytosis of a Transient Lysosome-Derived Membrane Domain', *Dev Cell*, 43(4),  
876 403-417.e10.
- 877 Natarajan, K., Sahoo, N.C. and Rao, K.V. (2001) Signal thresholds and modular synergy during  
878 expression of costimulatory molecules in B lymphocytes, *J Immunol*, 167(1), 114-22.
- 879 Natkanski, E., Lee, W.Y., Mistry, B., Casal, A., Molloy, J.E. and Tolar, P. (2013) B cells use  
880 mechanical energy to discriminate antigen affinities, *Science*, 340(6140), 1587-90.



881 Reddy, A., Caler, E.V. and Andrews, N.W. (2001) Plasma membrane repair is mediated by  
882 Ca<sup>2+</sup>-regulated exocytosis of lysosomes, *Cell*, 106(2), 157-69.

883 Reth, M. (1994) B cell antigen receptors, *Curr Opin Immunol*, 6(1), 3-8. Rodríguez, A., Webster,  
884 P., Ortego, J. and Andrews, N.W. (1997) Lysosomes behave as Ca<sup>2+</sup>-regulated exocytic vesicles  
885 in fibroblasts and epithelial cells, *J Cell Biol*, 137(1), 93-104.

886 Sagaert, X. and De Wolf-Peeters, C. (2003) Classification of B-cells according to their  
887 differentiation status, their micro-anatomical localisation and their developmental lineage,  
888 *Immunol Lett*, 90(2-3), 179-86.

889 Shlomchik, M.J. and Weisel, F. (2012) Germinal center selection and the development of  
890 memory B and plasma cells, *Immunol Rev*, 247(1), 52-63.

891 Spillane, K.M. and Tolar, P. (2017) B cell antigen extraction is regulated by physical properties  
892 of antigen-presenting cells, *J Cell Biol*, 216(1), 217-230.

893 Spillane, K.M. and Tolar, P. (2018) Mechanics of antigen extraction in the B cell synapse, *Mol*  
894 *Immunol*, 101, 319-328, available:

895 Suzuki, K., Grigороva, I., Phan, T.G., Kelly, L.M. and Cyster, J.G. (2009) Visualizing B cell  
896 capture of cognate antigen from follicular dendritic cells, *J Exp Med*, 206(7), 1485-93.

897 Tam, C., Idone, V., Devlin, C., Fernandes, M.C., Flannery, A., He, X., Schuchman, E., Tabas, I.  
898 and Andrews, N.W. (2010) Exocytosis of acid sphingomyelinase by wounded cells promotes  
899 endocytosis and plasma membrane repair, *J Cell Biol*, 189(6), 1027-38.

900 Tay, B., Stewart, T.A., Davis, F.M., Deuis, J.R. and Vetter, I. (2019) Development of a high-  
901 throughput fluorescent no-wash sodium influx assay, *PLoS One*, 14(3), e0213751.

902 Vidard, L., Kovacsovics-Bankowski, M., Kraeft, S.K., Chen, L.B., Benacerraf, B. and Rock,  
903 K.L. (1996) Analysis of MHC class II presentation of particulate antigens of B lymphocytes, *J*  
904 *Immunol*, 156(8), 2809-18.

905 Villeneuve, J., Bassaganyas, L., Lepreux, S., Chiritoiu, M., Costet, P., Ripoché, J., Malhotra, V.  
906 and Schekman, R. (2018) Unconventional secretion of FABP4 by endosomes and secretory  
907 lysosomes, *J Cell Biol*, 217(2), 649-665.

908 Wang, J., Lin, F., Wan, Z., Sun, X., Lu, Y., Huang, J., Wang, F., Zeng, Y., Chen, Y.H., Shi, Y.,  
909 Zheng, W., Li, Z., Xiong, C. and Liu, W. (2018) Profiling the origin, dynamics, and function of  
910 traction force in B cell activation, *Sci Signal*, 11(542).

911 Wang, J.C., Bolger-Munro, M. and Gold, M.R. (2018) Imaging the Interactions Between B Cells  
912 and Antigen-Presenting Cells, *Methods Mol Biol*, 1707, 131-161.

913 Yuseff, M.I., Reversat, A., Lankar, D., Diaz, J., Fanget, I., Pierobon, P., Randrian, V.,  
914 Larochette, N., Vascotto, F., Desdouets, C., Jauffred, B., Bellaïche, Y., Gasman, S., Darchen, F.,  
915 Desnos, C. and Lennon-Dumenil, A.M. (2011) Polarized secretion of lysosomes at the B cell  
916 synapse couples antigen extraction to processing and presentation, *Immunity*, 35(3), 361-74.

917 Zhang, Z., Chen, G., Zhou, W., Song, A., Xu, T., Luo, Q., Wang, W., Gu, X.S. and Duan, S.  
918 (2007) Regulated ATP release from astrocytes through lysosome exocytosis, *Nat Cell Biol*, 9(8),  
919 945-53.
